# Supplementary material for: Electrochemical oxidation synergizing with Brønsted-acid catalysis leads to [4 + 2] annulation for the synthesis of pyrazines
Source: Royal Society of Chemistry journal article supplement (doi:10.1039/c8gc03786h), 2019-01-01
Supplement: c8gc03786h1.pdf [file c8gc03786h1.pdf]

# Electrochemical Oxidation Synergizing with Brønsted-Acid Catalysis Leads to [4+2] Annulation for the Synthesis of Pyrazines

Kun Liu,<sup>1</sup> Chunlan Song,<sup>1</sup> Jiarong Wu,<sup>1</sup> Yuqi Deng,<sup>1</sup> Shan Tang,<sup>1</sup> Aiwen Lei<sup>1</sup>

<sup>1</sup>College of Chemistry and Molecular Sciences, the Institute for Advanced Studies (IAS), Wuhan University, Wuhan 430072, P. R. China; Correspondence and requests for materials should be addressed to A.L. (email: [aiwenlei@whu.edu.cn](mailto:aiwenlei@whu.edu.cn)).

|                                              |            |
|----------------------------------------------|------------|
| <b>General information.....</b>              | <b>S2</b>  |
| <b>Experimental procedure.....</b>           | <b>S2</b>  |
| <b>Detail descriptions for products.....</b> | <b>S4</b>  |
| <b>Copies of product NMR spectra.....</b>    | <b>S10</b> |
| <b>References.....</b>                       | <b>S38</b> |

## General information

All glasswares were oven dried at 110 °C for hours and cooled down under vacuum. Unless otherwise noted, materials were obtained from commercial suppliers and used without further purification. The instrument for electrolysis is dual display potentiostat (DJS-292B) (made in China). The anodic electrode was graphite rod ( $\phi$  6 mm) and cathodic electrode was platinum plate (15 mm $\times$ 15 mm $\times$ 0.3 mm). Thin layer chromatography (TLC) employed glass 0.25 mm silica gel plates. Flash chromatography columns were packed with 200-300 mesh silica gel in petroleum (bp. 60-90 °C).  $^1\text{H}$  and  $^{13}\text{C}$  NMR data were recorded with Bruker Advance III (400 MHz) spectrometers with tetramethylsilane as an internal standard. All chemical shifts ( $\delta$ ) are reported in ppm and coupling constants ( $J$ ) in Hz. All chemical shifts were reported relative to tetramethylsilane (0 ppm for  $^1\text{H}$ ),  $\text{CDCl}_3$  (77.0 ppm for  $^{13}\text{C}$ ) and DMSO (2.50 ppm for  $^1\text{H}$ , 39.50 ppm for  $^{13}\text{C}$ ), respectively. High resolution mass spectra (HRMS) were measured with a Waters Micromass GCT instrument and accurate masses were reported for the molecular ion ( $\text{M}^+$ ) or molecular hydrogen ion ( $\text{M}+\text{H}^+$ ).

## Experimental procedure

**General procedure for the external oxidant-free electrooxidative [4+2] cyclization for the synthesis of pyrazine:** In an oven-dried undivided three-necked bottle (25 mL) equipped with a stir bar,  $\text{TsOH}\cdot\text{H}_2\text{O}$  (0.03 mmol) and KI (64.7 mg, 0.39 mmol) was added. The bottle was equipped with graphite rod ( $\phi$  6 mm, about 15 mm immersion depth in solution) as the anode and platinum plate (15 mm $\times$ 15 mm $\times$ 0.3 mm) as the cathode and charged with nitrogen. Subsequently, ketone (0.3 mmol), ethylenediamine (1.5 mmol) and DMA (9.0 mL) were added. Then the electrolysis system was stirred at a constant current of 13 mA under 100 °C for 5.7 h. When the reaction finished, the reaction mixture was washed with water and extracted with diethyl ether (10 mL  $\times$  3). The organic layers were combined, dried over  $\text{Na}_2\text{SO}_4$ , and concentrated. The pure product was obtained by flash column chromatography on silica gel (petroleum: ethyl acetate = 50:1).

**Procedure for gram scale synthesis of 3aa:** In an oven-dried undivided three-necked bottle (250 mL) equipped with a stir bar,  $\text{TsOH}\cdot\text{H}_2\text{O}$  (1.0 mmol) and KI (10 mmol) was added. The bottle was equipped with graphite rod ( $\phi$  6 mm, about 15 mm immersion depth in solution) as the anode and platinum plate (15 mm $\times$ 15 mm $\times$ 0.3 mm) as the cathode and charged with nitrogen. Subsequently,

ketone (10 mmol), ethylenediamine(50 mmol) and DMA (220 mL) were added. Then the electrolysis system was stirred at a constant current of 20 mA under 100 °C for 120 h. When the reaction finished, the reaction mixture was washed with water and extracted with diethyl ether (150 mL x 3). The organic layers were combined, dried over Na<sub>2</sub>SO<sub>4</sub>, and concentrated. The pure product was obtained by flash column chromatography on silica gel (petroleum: ethyl acetate = 50:1).

## Detail descriptions for products

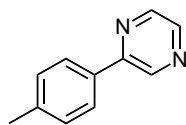

**2-(*p*-Tolyl)pyrazine (3aa)<sup>1</sup>:** white solid was obtained in 83% isolated yield. <sup>1</sup>H NMR (400 MHz, DMSO-*d*<sub>6</sub>) δ 9.22 (d, *J* = 1.6 Hz, 1H), 8.68 (dd, *J* = 2.4, 1.6 Hz, 1H), 8.57 (d, *J* = 2.4 Hz, 1H), 8.11 – 7.99 (m, 2H), 7.48 – 7.27 (m, 2H), 2.37 (s, 3H). <sup>13</sup>C NMR (101 MHz, DMSO-*d*<sub>6</sub>) δ 151.48, 144.24, 143.10, 141.78, 139.73, 133.12, 129.68, 126.61, 20.92.

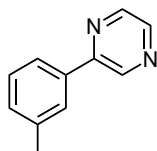

**2-(*m*-Tolyl)pyrazine (3ba)<sup>1</sup>:** colorless liquid was obtained in 81% isolated yield. <sup>1</sup>H NMR (400 MHz, DMSO-*d*<sub>6</sub>) δ 9.23 (d, *J* = 1.6 Hz, 1H), 8.71 (dd, *J* = 2.4, 1.6 Hz, 1H), 8.60 (d, *J* = 2.8 Hz, 1H), 7.99 – 7.95 (m, 1H), 7.94 – 7.90 (m, 1H), 7.42 (t, *J* = 7.6 Hz, 1H), 7.34 – 7.29 (m, 1H), 2.40 (s, 3H). <sup>13</sup>C NMR (101 MHz, DMSO-*d*<sub>6</sub>) δ 151.53, 144.23, 143.33, 142.03, 138.28, 135.81, 130.57, 128.93, 127.25, 123.84, 21.07.

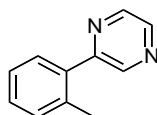

**2-(*o*-Tolyl)pyrazine (3ca)<sup>2</sup>:** colorless liquid was obtained in 65% isolated yield. <sup>1</sup>H NMR (400 MHz, DMSO-*d*<sub>6</sub>) δ 8.82 (d, *J* = 1.6 Hz, 1H), 8.74 (dd, *J* = 2.4, 1.6 Hz, 1H), 8.63 (d, *J* = 2.8 Hz, 1H), 7.46 (dd, *J* = 7.2, 1.6 Hz, 1H), 7.42 – 7.30 (m, 3H), 2.34 (s, 3H). <sup>13</sup>C NMR (101 MHz, DMSO-*d*<sub>6</sub>) δ 154.65, 144.83, 143.93, 142.91, 136.60, 135.97, 130.93, 129.86, 129.11, 126.17, 20.03.

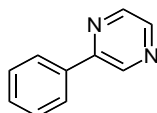

**2-Phenylpyrazine (3da)<sup>3</sup>:** white solid was obtained in 73% isolated yield. <sup>1</sup>H NMR (400 MHz, DMSO-*d*<sub>6</sub>) δ 9.25 (d, *J* = 1.6 Hz, 1H), 8.71 (dd, *J* = 2.4, 1.2 Hz, 1H), 8.61 (d, *J* = 2.4 Hz, 1H), 8.22 – 8.03 (m, 2H), 7.63 – 7.42 (m, 3H). <sup>13</sup>C NMR (101 MHz, DMSO-*d*<sub>6</sub>) δ 151.47, 144.33, 143.46, 142.08, 135.90, 129.98, 129.07, 126.74.

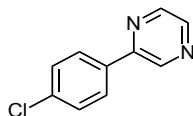

**2-(4-Chlorophenyl)pyrazine (3ea)<sup>3</sup>:** white solid was obtained in 79% isolated yield. <sup>1</sup>H NMR (400 MHz, DMSO-*d*<sub>6</sub>) δ 9.27 (d, *J* = 1.6 Hz, 1H), 8.72 (dd, *J* = 2.4, 1.6 Hz, 1H), 8.63 (d, *J* = 2.8 Hz, 1H), 8.23 – 8.09 (m, 2H), 7.77 – 7.49 (m, 2H). <sup>13</sup>C NMR (101 MHz, DMSO-*d*<sub>6</sub>) δ 150.27, 144.34, 143.76, 142.05, 134.91, 134.71, 129.10, 128.49.

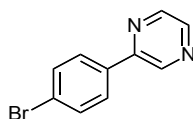

**2-(4-Bromophenyl)pyrazine (3fa)<sup>3</sup>:** white solid was obtained in 73% isolated yield. <sup>1</sup>H NMR (400 MHz, DMSO-*d*<sub>6</sub>) δ 9.23 (d, *J* = 1.6 Hz, 1H), 8.69 (dd, *J* = 2.4, 1.6 Hz, 1H), 8.61 (d, *J* = 2.8 Hz, 1H),

8.11 – 8.00 (m, 2H), 7.75 – 7.60 (m, 2H).  $^{13}\text{C}$  NMR (101 MHz,  $\text{DMSO-}d_6$ )  $\delta$  150.27, 144.26, 143.70, 141.91, 134.98, 131.91, 128.63, 123.68.

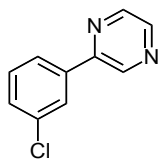

**2-(3-Chlorophenyl)pyrazine (3ga)**<sup>3</sup>: white solid was obtained in 60% isolated yield.  $^1\text{H}$  NMR (400 MHz,  $\text{DMSO-}d_6$ )  $\delta$  9.29 (d,  $J = 1.4$  Hz, 1H), 8.73 – 8.70 (m, 1H), 8.64 (d,  $J = 2.4$  Hz, 1H), 8.18 – 8.14 (m, 1H), 8.12 – 8.06 (m, 1H), 7.58 – 7.51 (m, 2H).  $^{13}\text{C}$  NMR (101 MHz,  $\text{DMSO-}d_6$ )  $\delta$  149.87, 144.35, 144.09, 142.29, 137.95, 133.98, 130.90, 129.72, 126.37, 125.28.

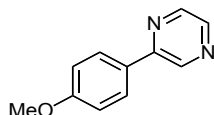

**2-(4-Methoxyphenyl)pyrazine (3ha)**<sup>3</sup>: white solid was obtained in 76% isolated yield.  $^1\text{H}$  NMR (400 MHz,  $\text{DMSO-}d_6$ )  $\delta$  9.19 (d,  $J = 1.6$  Hz, 1H), 8.64 (dd,  $J = 2.4, 1.6$  Hz, 1H), 8.52 (d,  $J = 2.4$  Hz, 1H), 8.20 – 8.01 (m, 2H), 7.20 – 6.93 (m, 2H), 3.82 (s, 3H).  $^{13}\text{C}$  NMR (101 MHz,  $\text{DMSO-}d_6$ )  $\delta$  160.82, 151.29, 144.11, 142.50, 141.41, 128.25, 128.18, 114.47, 55.32.

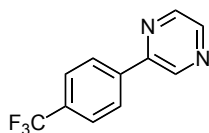

**2-(4-(Trifluoromethyl)phenyl)pyrazine (3ia)**<sup>3</sup>: white solid was obtained in 68% isolated yield.  $^1\text{H}$  NMR (400 MHz,  $\text{DMSO-}d_6$ )  $\delta$  9.35 (d,  $J = 1.6$  Hz, 1H), 8.78 (dd,  $J = 2.4, 1.6$  Hz, 1H), 8.70 (d,  $J = 2.4$  Hz, 1H), 8.40 – 8.31 (m, 2H), 7.96 – 7.77 (m, 2H).  $^{13}\text{C}$  NMR (101 MHz,  $\text{DMSO-}d_6$ )  $\delta$  149.92, 144.55, 144.46, 142.61, 139.78 (q,  $J_{\text{C-F}} = 2.0$  Hz), 129.95 (q,  $J_{\text{C-F}} = 32.0$  Hz), 127.53, 125.91 (q,  $J_{\text{C-F}} = 3.7$  Hz), 124.15 (q,  $J_{\text{C-F}} = 273.7$  Hz).  $^{19}\text{F}$  NMR (377 MHz,  $\text{DMSO-}d_6$ )  $\delta$  -61.24.

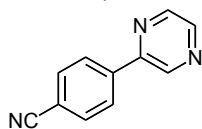

**4-(Pyrazin-2-yl)benzotrile (3ja)**<sup>3</sup>: white solid was obtained in 51% isolated yield.  $^1\text{H}$  NMR (400 MHz,  $\text{DMSO-}d_6$ )  $\delta$  9.37 (d,  $J = 1.6$  Hz, 1H), 8.79 (dd,  $J = 2.4, 1.6$  Hz, 1H), 8.71 (d,  $J = 2.4$  Hz, 1H), 8.40 – 8.26 (m, 2H), 8.10 – 7.95 (m, 2H).  $^{13}\text{C}$  NMR (101 MHz,  $\text{DMSO-}d_6$ )  $\delta$  149.61, 144.67, 144.62, 142.79, 140.18, 133.01, 127.51, 118.64, 112.36.

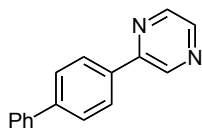

**2-([1,1'-Biphenyl]-4-yl)pyrazine (3ka)**<sup>3</sup>: white solid was obtained in 66% isolated yield.  $^1\text{H}$  NMR (400 MHz,  $\text{DMSO-}d_6$ )  $\delta$  9.31 (d,  $J = 1.2$  Hz, 1H), 8.73 (dd,  $J = 2.4, 1.6$  Hz, 1H), 8.62 (d,  $J = 2.4$  Hz, 1H), 8.33 – 8.19 (m, 2H), 7.94 – 7.80 (m, 2H), 7.80 – 7.71 (m, 2H), 7.54 – 7.46 (m, 2H), 7.45 – 7.36 (m, 1H).  $^{13}\text{C}$  NMR (101 MHz,  $\text{DMSO-}d_6$ )  $\delta$  151.06, 144.40, 143.48, 142.06, 141.54, 139.27, 134.88, 129.10, 127.99, 127.31, 126.78.

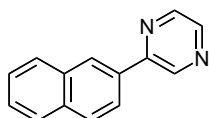

**2-(Naphthalen-2-yl)pyrazine (3la)**<sup>3</sup>: white solid was obtained in 75% isolated yield. <sup>1</sup>H NMR (400 MHz, DMSO-*d*<sub>6</sub>) δ 9.41 (d, *J* = 1.6 Hz, 1H), 8.78 – 7.71 (m, 2H), 8.64 (d, *J* = 2.4 Hz, 1H), 8.27 (dd, *J* = 8.8, 2.0 Hz, 1H), 8.17 – 8.01 (m, 2H), 8.01 – 7.90 (m, 1H), 7.61 – 7.54 (m, 2H). <sup>13</sup>C NMR (101 MHz, DMSO-*d*<sub>6</sub>) δ 151.38, 144.37, 143.46, 142.36, 133.53, 133.25, 132.99, 128.77, 128.68, 127.66, 127.24, 126.74, 126.48, 123.91.

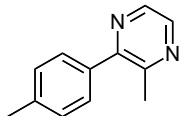

**2-Methyl-3-(*p*-tolyl)pyrazine (3ma)**<sup>3</sup>: colorless oil was obtained in 72% isolated yield. <sup>1</sup>H NMR (400 MHz, DMSO-*d*<sub>6</sub>) δ 8.56 – 8.52 (m, 1H), 8.49 (d, *J* = 2.4 Hz, 1H), 7.56 – 7.49 (m, 2H), 7.31 (d, *J* = 7.6 Hz, 2H), 2.56 (s, 3H), 2.38 (s, 3H). <sup>13</sup>C NMR (101 MHz, DMSO-*d*<sub>6</sub>) δ 152.99, 151.12, 142.09, 141.65, 138.16, 135.54, 128.94, 128.83, 23.06, 20.86.

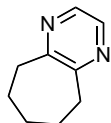

**6,7,8,9-Tetrahydro-5H-cyclohepta[b]pyrazine (3na)**<sup>3</sup>: colorless liquid was obtained in 50% isolated yield. <sup>1</sup>H NMR (400 MHz, CDCl<sub>3</sub>) δ 8.24 (s, 2H), 3.60 – 2.68 (m, 4H), 2.10 – 1.82 (m, 2H), 1.78 – 1.68 (m, 4H). <sup>13</sup>C NMR (101 MHz, CDCl<sub>3</sub>) δ 158.58, 140.86, 38.14, 32.19, 26.17.

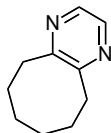

**5,6,7,8,9,10-Hexahydrocycloocta[b]pyrazine (3oa)**<sup>3</sup>: colorless liquid was obtained in 41% isolated yield. <sup>1</sup>H NMR (400 MHz, CDCl<sub>3</sub>) δ 8.33 (s, 2H), 3.21 – 2.91 (m, 4H), 1.99 – 1.76 (m, 4H), 1.44 – 1.36 (m, 4H). <sup>13</sup>C NMR (101 MHz, CDCl<sub>3</sub>) δ 156.70, 141.83, 34.30, 30.61, 25.92.

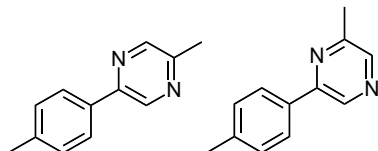

Isomer (1.08:1 based on NMR)

**2-Methyl-5(6)-(*p*-tolyl)pyrazine (3ab)**<sup>5</sup>: white solid was obtained in 82% isolated yield. <sup>1</sup>H NMR (400 MHz, DMSO-*d*<sub>6</sub>) δ 9.05 (d, *J* = 1.6 Hz, 0.47H), 8.99 (s, 0.52H), 8.55 (d, *J* = 1.6 Hz, 0.46H), 8.45 (s, 0.48H), 8.06 – 7.95 (m, 2H), 7.45 – 7.23 (m, 2H), 2.53 (s, 1.55H), 2.50 (s, 1.62H), 2.36 – 2.33 (m, 3H). <sup>13</sup>C NMR (101 MHz, DMSO-*d*<sub>6</sub>) δ 152.82, 151.72, 150.27, 148.58, 143.62, 142.56, 140.41, 139.47, 139.14, 138.50, 133.24, 133.21, 129.58, 126.56, 126.25, 21.33, 20.90, 20.88, 20.81. HRMS (ESI) calculated for C<sub>20</sub>H<sub>19</sub>N<sub>2</sub>S<sup>+</sup> [M+H]<sup>+</sup>: 319.1263; found: 319.1258.

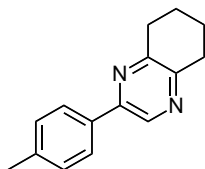

**2-(*p*-Tolyl)-5,6,7,8-tetrahydroquinoxaline (3ac)**<sup>6</sup>: colorless liquid was obtained in 74% isolated yield. <sup>1</sup>H NMR (400 MHz, CDCl<sub>3</sub>) δ 8.71 (s, 1H), 7.87 (dt, *J* = 8.0, 1.6 Hz, 2H), 7.31 – 7.26 (m, 2H), 3.05 – 2.94 (m, 4H), 2.41 (s, 3H), 2.00 – 1.85 (m, 4H). <sup>13</sup>C NMR (101 MHz, CDCl<sub>3</sub>) δ 152.13, 150.69, 149.64, 139.23, 138.56, 134.04, 129.57, 126.55, 32.13, 31.62, 22.67, 21.28.

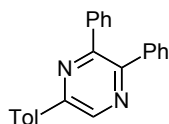

**2,3-Diphenyl-5-(p-tolyl)pyrazine (3ad)**<sup>7</sup>: white solid was obtained in 53% isolated yield. <sup>1</sup>H NMR (400 MHz, DMSO-*d*<sub>6</sub>) δ 9.25 (s, 1H), 8.18 – 8.09 (m, 2H), 7.51 – 7.45 (m, 2H), 7.45 – 7.41 (m, 2H), 7.39 – 7.31 (m, 8H), 2.38 (s, 3H). <sup>13</sup>C NMR (101 MHz, DMSO-*d*<sub>6</sub>) δ 150.70, 149.81, 148.58, 139.78, 138.80, 138.62, 138.35, 132.78, 129.69, 129.59, 129.46, 128.65, 128.53, 128.22, 128.18, 126.70, 20.98.

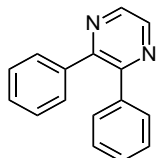

**2-([1,1'-Biphenyl]-4-yl)-3-phenylpyrazine (3pa)**<sup>3</sup>: white solid was obtained in 86% isolated yield.

<sup>1</sup>H NMR (400 MHz, CDCl<sub>3</sub>) δ 8.60 (s, 2H), 7.51 – 7.42 (m, 4H), 7.35 – 7.27 (m, 6H). <sup>13</sup>C NMR (101 MHz, CDCl<sub>3</sub>) δ 152.74, 142.03, 138.49, 129.56, 128.61, 128.21.

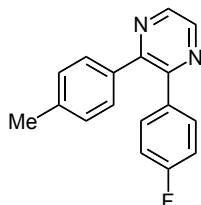

**2-(4-Fluorophenyl)-3-(p-tolyl)pyrazine (3qa)**: white solid was obtained in 58% isolated yield. <sup>1</sup>H NMR (400 MHz, DMSO-*d*<sub>6</sub>) δ 8.67 (dd, *J* = 8.0, 2.4 Hz, 2H), 7.47 – 7.37 (m, 2H), 7.28 (dt, *J* = 8.0, 2.0 Hz, 2H), 7.22 – 7.10 (m, 4H), 2.29 (s, 3H). <sup>13</sup>C NMR (101 MHz, DMSO-*d*<sub>6</sub>) δ 163.43, 160.99, 151.83, 150.80, 142.31 (d, *J*<sub>C-F</sub> = 35.1 Hz), 138.21, 135.48, 135.10 (d, *J*<sub>C-F</sub> = 3.1 Hz), 131.66 (d, *J*<sub>C-F</sub> = 8.5 Hz), 129.43, 128.89, 115.22 (q, *J*<sub>C-F</sub> = 21.8 Hz), 20.83. <sup>19</sup>F NMR (377 MHz, DMSO-*d*<sub>6</sub>) δ -113.02. HRMS (ESI) calculated for C<sub>17</sub>H<sub>14</sub>FN<sub>2</sub><sup>+</sup> [M+H]<sup>+</sup>: 265.1136; found: 265.1135.

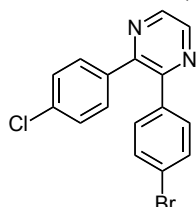

**2-(4-Bromophenyl)-3-(4-chlorophenyl)pyrazine (3ra)**: white solid was obtained in 66% isolated yield. <sup>1</sup>H NMR (400 MHz, DMSO-*d*<sub>6</sub>) δ 8.75 – 8.70 (m, 2H), 7.64 – 7.48 (m, 2H), 7.44 – 7.39 (m, 4H), 7.37 – 7.29 (m, 2H). <sup>13</sup>C NMR (101 MHz, DMSO-*d*<sub>6</sub>) δ 150.82, 150.73, 142.79, 137.44, 137.05, 133.72, 131.63, 131.37, 131.35, 129.51, 128.44, 122.49. HRMS (ESI) calculated for C<sub>16</sub>H<sub>11</sub>BrClN<sub>2</sub><sup>+</sup> [M+H]<sup>+</sup>: 344.9789; found: 344.9788.

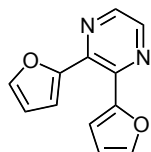

**2,3-Di(furan-2-yl)pyrazine (3sa)**<sup>4</sup>: light yellow solid was obtained in 70% isolated yield. <sup>1</sup>H NMR (400 MHz, DMSO-*d*<sub>6</sub>) δ 8.62 (s, 2H), 7.82 (dd, *J* = 2.0, 0.8 Hz, 2H), 6.75 (dd, *J* = 3.6, 0.8 Hz, 2H), 6.66 (dd, *J* = 3.2, 2.0 Hz, 2H). <sup>13</sup>C NMR (101 MHz, DMSO-*d*<sub>6</sub>) δ 150.37, 144.61, 142.51, 140.87, 112.16, 112.12.

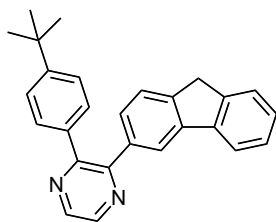

**2-(4-(Tert-butyl)phenyl)-3-(9H-fluoren-3-yl)pyrazine (3ta):** white solid was obtained in 68% isolated yield. <sup>1</sup>H NMR (400 MHz, CDCl<sub>3</sub>) δ 8.57 (s, 2H), 7.77 (dt, *J* = 7.6, 1.0 Hz, 1H), 7.71 (q, *J* = 0.8 Hz, 1H), 7.70 – 7.67 (d, *J* = 8.0 Hz, 1H), 7.53 (dt, *J* = 7.2, 1.2 Hz, 1H), 7.48 – 7.40 (m, 3H), 7.37 (td, *J* = 7.6, 1.2 Hz, 1H), 7.34 – 7.27 (m, 3H), 3.85 (s, 2H), 1.29 (s, 9H). <sup>13</sup>C NMR (101 MHz, CDCl<sub>3</sub>) δ 152.86, 152.75, 151.79, 143.69, 143.23, 142.01, 141.80, 141.66, 141.06, 137.16, 135.70, 129.21, 128.60, 127.03, 126.80, 126.13, 125.22, 125.05, 120.16, 119.55, 36.87, 34.60, 31.17. HRMS (ESI) calculated for C<sub>27</sub>H<sub>25</sub>N<sub>2</sub><sup>+</sup> [M+H]<sup>+</sup>: 377.2012; found: 377.2013.

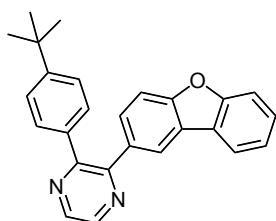

**2-(4-(Tert-butyl)phenyl)-3-(dibenzo[b,d]furan-2-yl)pyrazine (3ua):** white solid was obtained in 71% isolated yield. <sup>1</sup>H NMR (400 MHz, CDCl<sub>3</sub>) δ 8.60 (s, 2H), 8.18 (dd, *J* = 2.0, 0.4 Hz, 1H), 7.88 – 7.83 (m, 1H), 7.56 (dt, *J* = 8.0, 0.8 Hz, 1H), 7.49 – 7.39 (m, 5H), 7.36 – 7.27 (m, 3H), 1.28 (s, 9H). <sup>13</sup>C NMR (101 MHz, CDCl<sub>3</sub>) δ 156.51, 156.20, 152.82, 152.44, 151.89, 141.91, 141.72, 135.61, 133.53, 129.21, 129.05, 127.31, 125.27, 124.44, 124.00, 122.85, 122.03, 120.70, 111.67, 111.25, 34.59, 31.15. HRMS (ESI) calculated for C<sub>26</sub>H<sub>23</sub>N<sub>2</sub>O<sup>+</sup> [M+H]<sup>+</sup>: 379.1805; found: 379.1804.

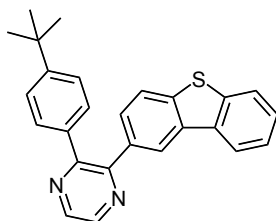

**2-(4-(Tert-butyl)phenyl)-3-(dibenzo[b,d]thiophen-2-yl)pyrazine (3va):** white solid was obtained in 51% isolated yield. <sup>1</sup>H NMR (400 MHz, DMSO-*d*<sub>6</sub>) δ 8.72 (q, *J* = 2.4 Hz, 2H), 8.37 (d, *J* = 1.6 Hz, 1H), 8.08 (d, *J* = 7.6 Hz, 1H), 8.01 (d, *J* = 7.6 Hz, 1H), 7.92 (d, *J* = 8.4 Hz, 1H), 7.53 – 7.41 (m, 3H), 7.40 – 7.28 (m, 4H), 1.20 (s, 9H). <sup>13</sup>C NMR (101 MHz, DMSO) δ 152.03, 151.47, 151.31, 142.43, 142.29, 138.96, 138.92, 135.73, 135.26, 134.96, 134.76, 129.27, 128.23, 127.39, 125.08, 124.89, 123.20, 122.94, 122.69, 121.82, 34.41, 31.00. HRMS (ESI) calculated for C<sub>26</sub>H<sub>23</sub>N<sub>2</sub>S<sup>+</sup> [M+H]<sup>+</sup>: 395.1576; found: 395.1569.

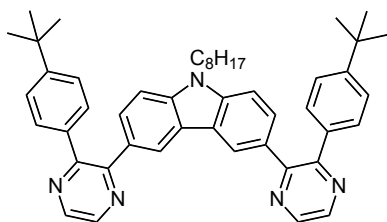



**3,6-Bis(3-(4-(tert-butyl)phenyl)pyrazin-2-yl)-9-octyl-9H-carbazole (3wa):** light yellow oil was obtained in 78% isolated yield. <sup>1</sup>H NMR (400 MHz, CDCl<sub>3</sub>) δ 8.57 (dd, *J* = 8.8, 2.4 Hz, 4H), 8.18 (d, *J* = 1.6 Hz, 2H), 7.51 (dd, *J* = 8.4, 2.0 Hz, 2H), 7.42 (dt, *J* = 8.4, 2.0 Hz, 4H), 7.30 (dt, *J* = 8.8, 2.0 Hz, 4H), 7.27 (s, 1H), 7.25 (s, 1H), 4.25 (t, *J* = 7.2 Hz, 2H), 1.89 – 1.77 (m, 2H), 1.37 – 1.17 (m, 28H), 0.85 (t, *J* = 6.8 Hz, 3H). <sup>13</sup>C NMR (101 MHz, CDCl<sub>3</sub>) δ 153.14, 152.58, 151.62, 141.70, 141.24, 140.92, 136.18, 129.63, 129.13, 127.76, 125.25, 123.02, 122.03, 108.43, 43.32, 34.58, 31.71, 31.15, 29.29, 29.10, 28.91, 27.22, 22.53, 14.03. HRMS (ESI) calculated for C<sub>48</sub>H<sub>54</sub>N<sub>5</sub><sup>+</sup> [M+H]<sup>+</sup>: 700.4374; found: 700.4374.

# Copies of product NMR Spectra

3aa

<sup>1</sup>H NMR

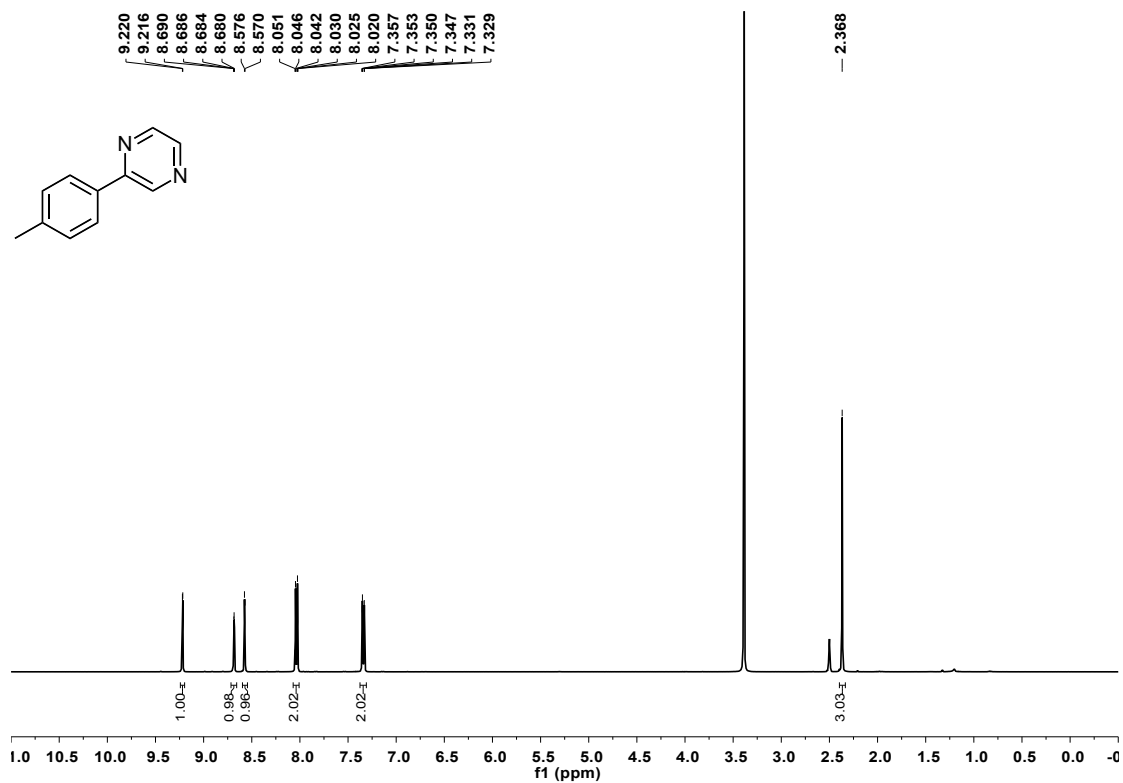

<sup>13</sup>C NMR

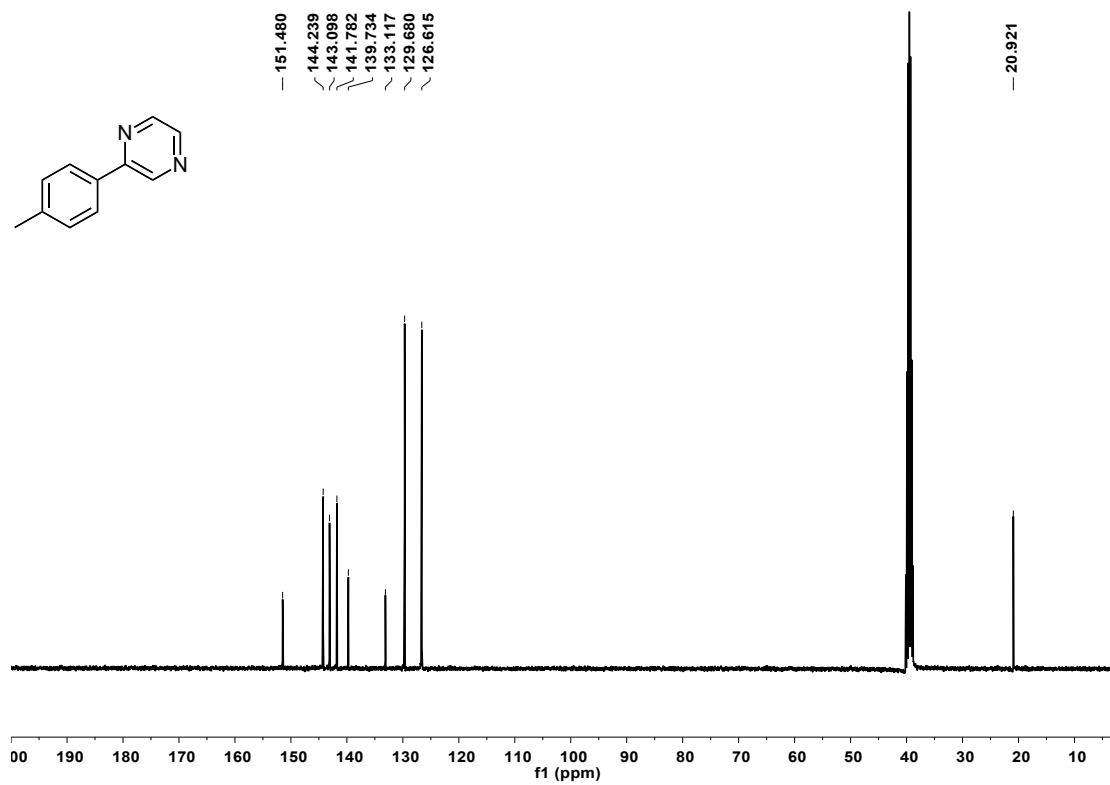

### 3ba

#### <sup>1</sup>H NMR

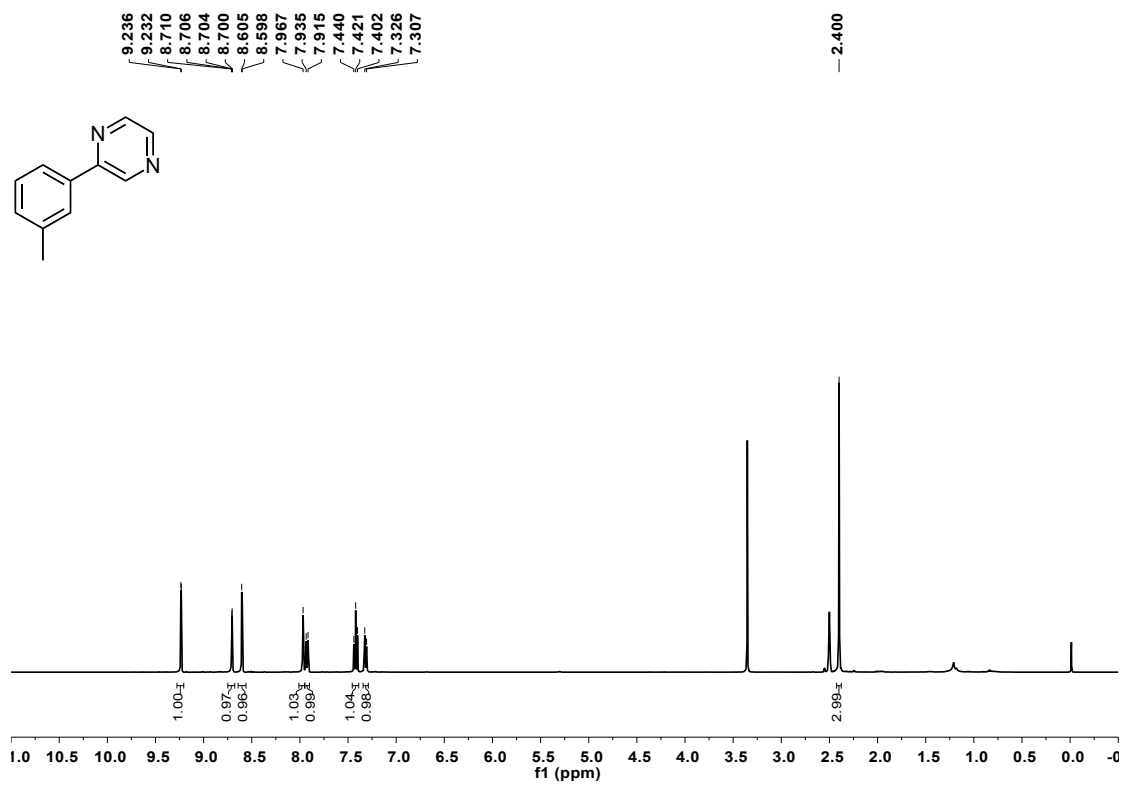

#### <sup>13</sup>C NMR

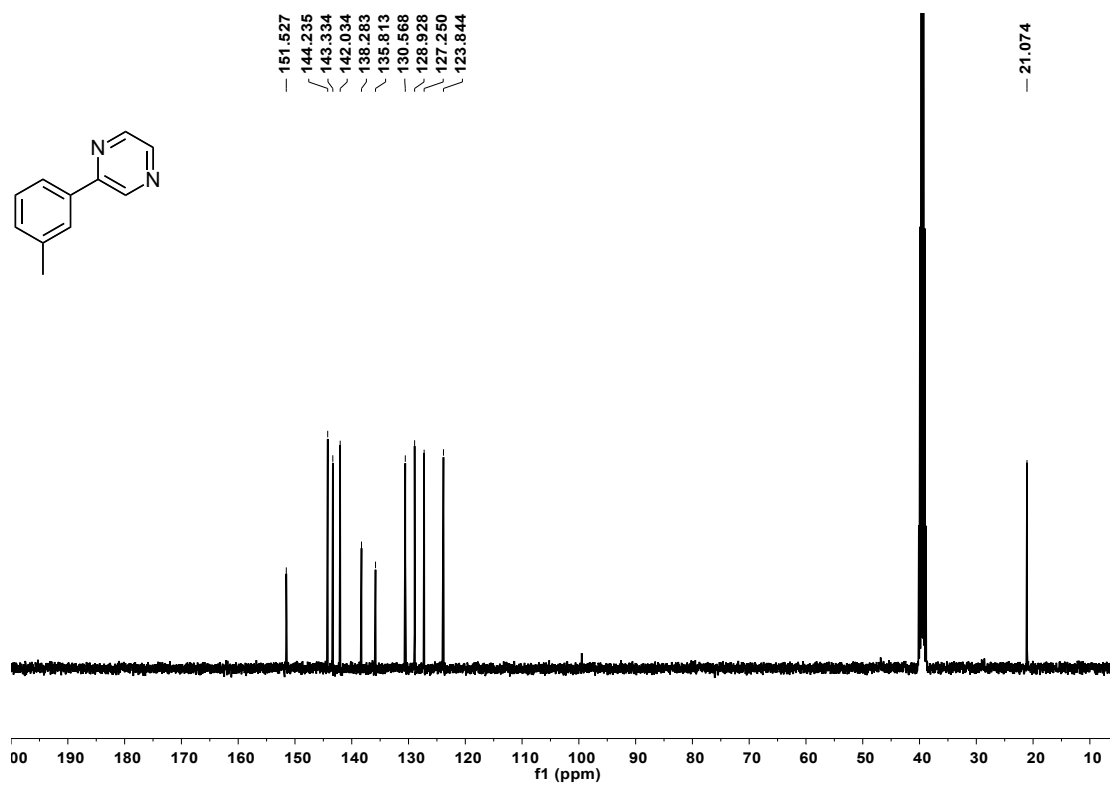

### 3ca

#### <sup>1</sup>H NMR

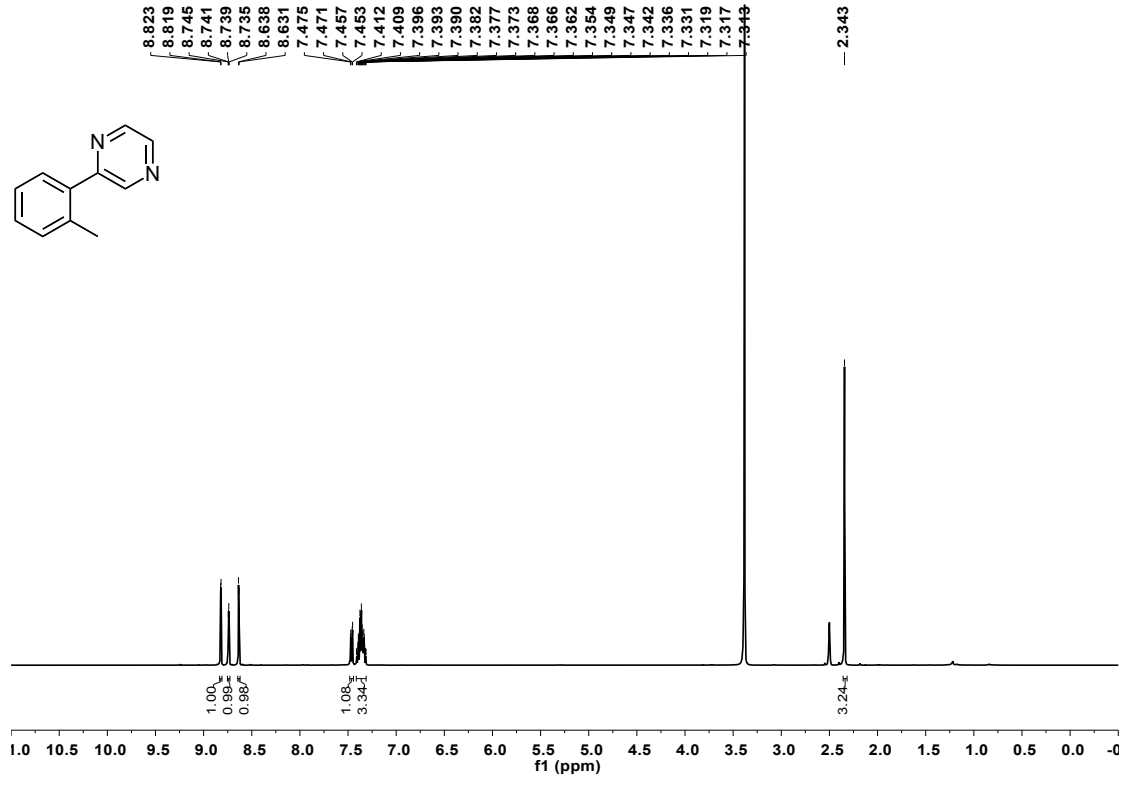

#### <sup>13</sup>C NMR

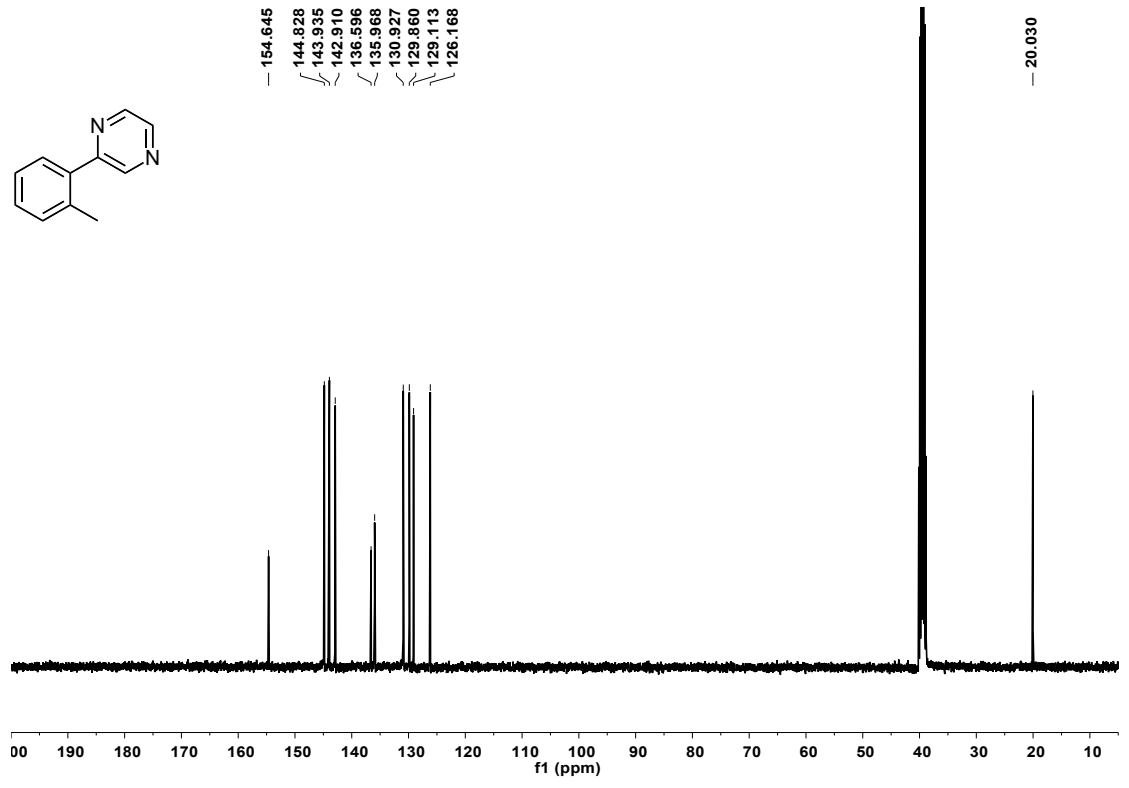

### 3da

#### <sup>1</sup>H NMR

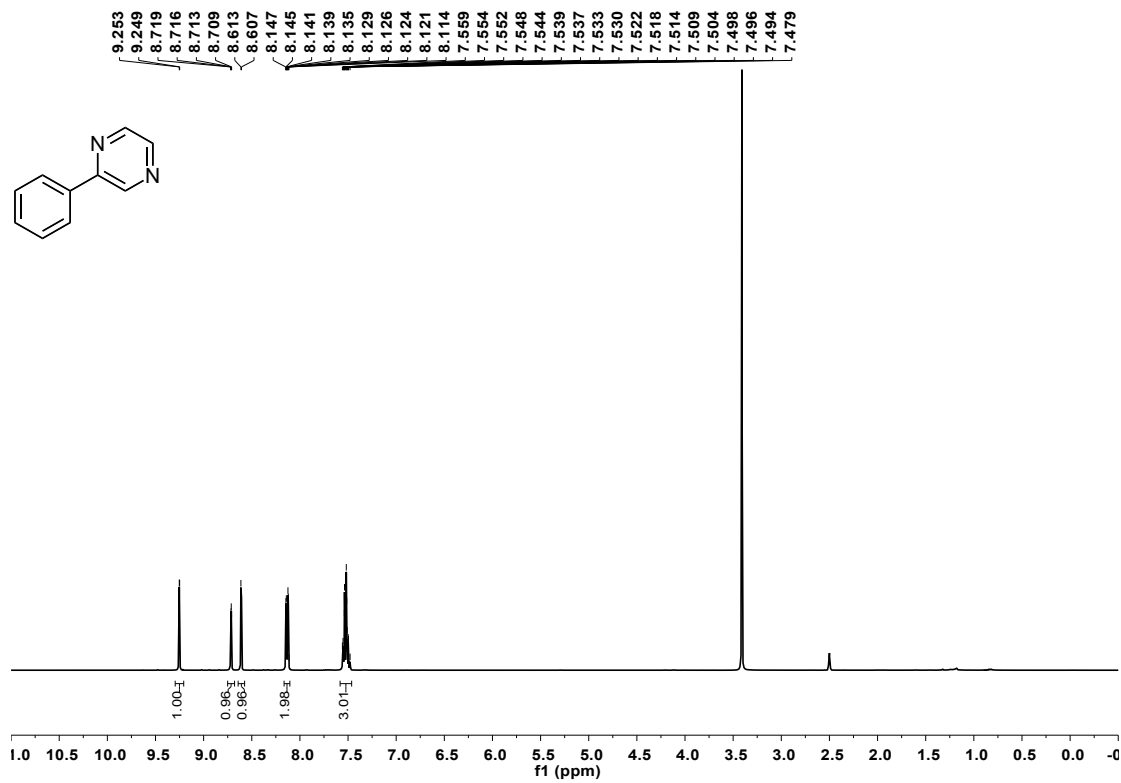

#### <sup>13</sup>C NMR

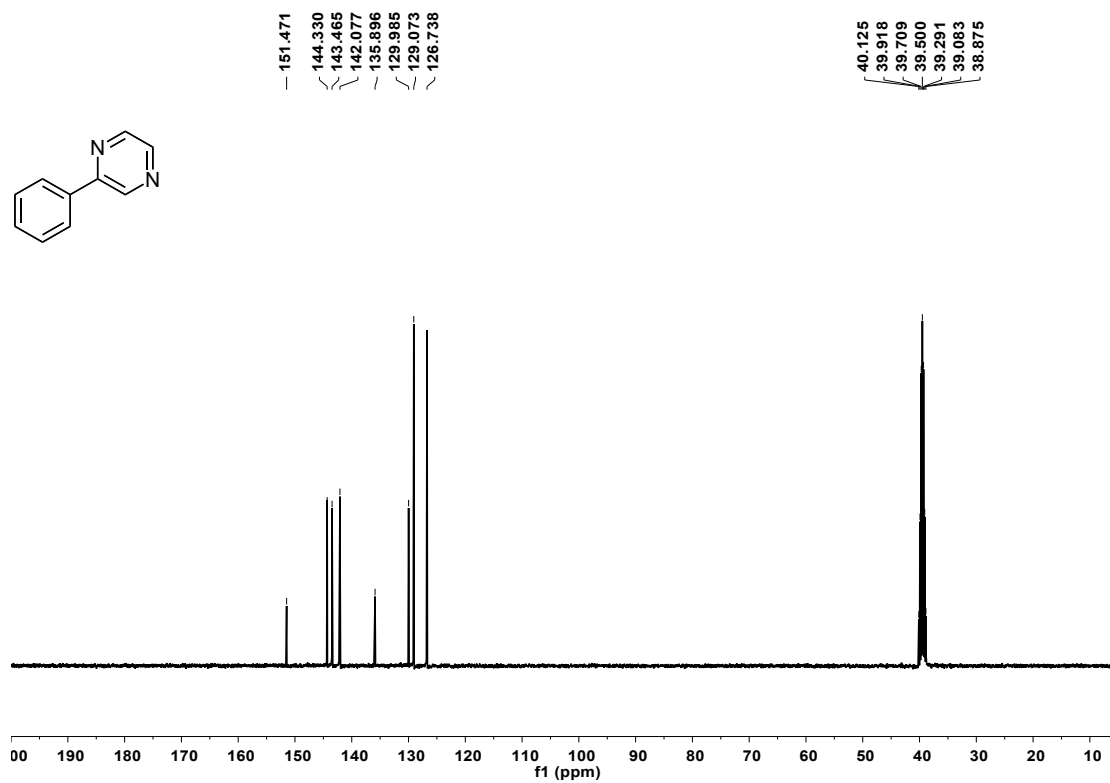

3ea

<sup>1</sup>H NMR

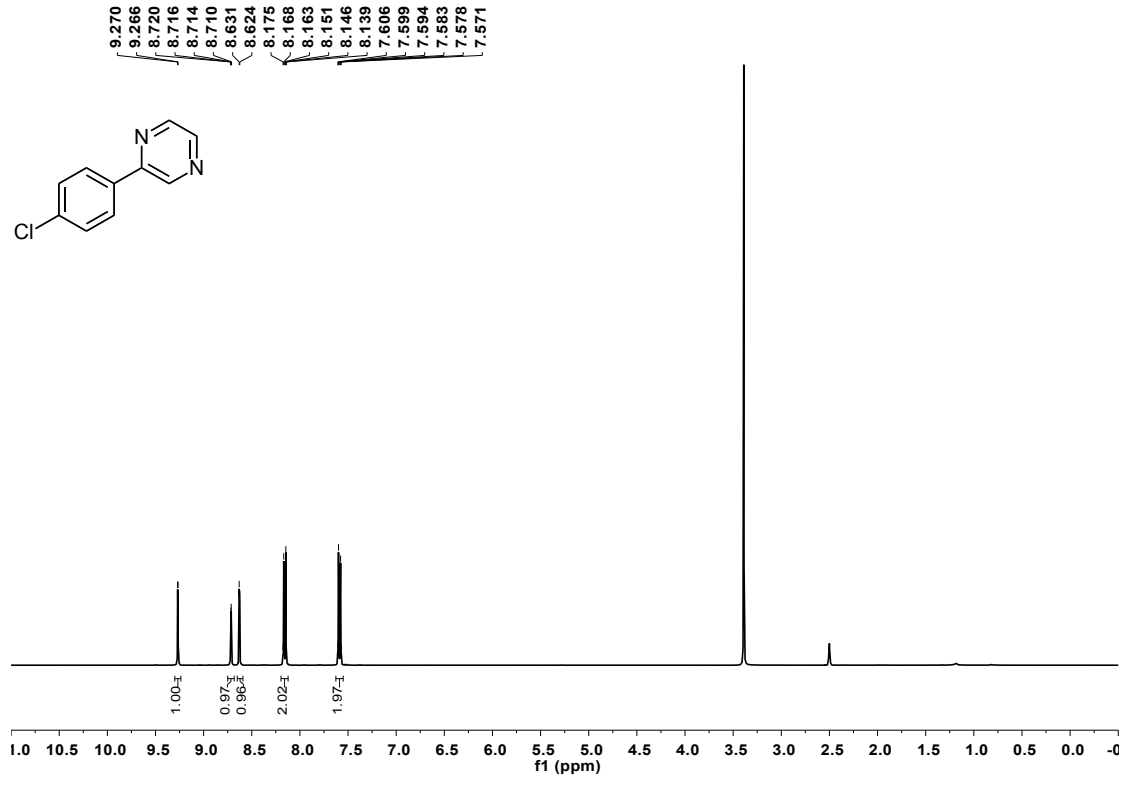

<sup>13</sup>C NMR

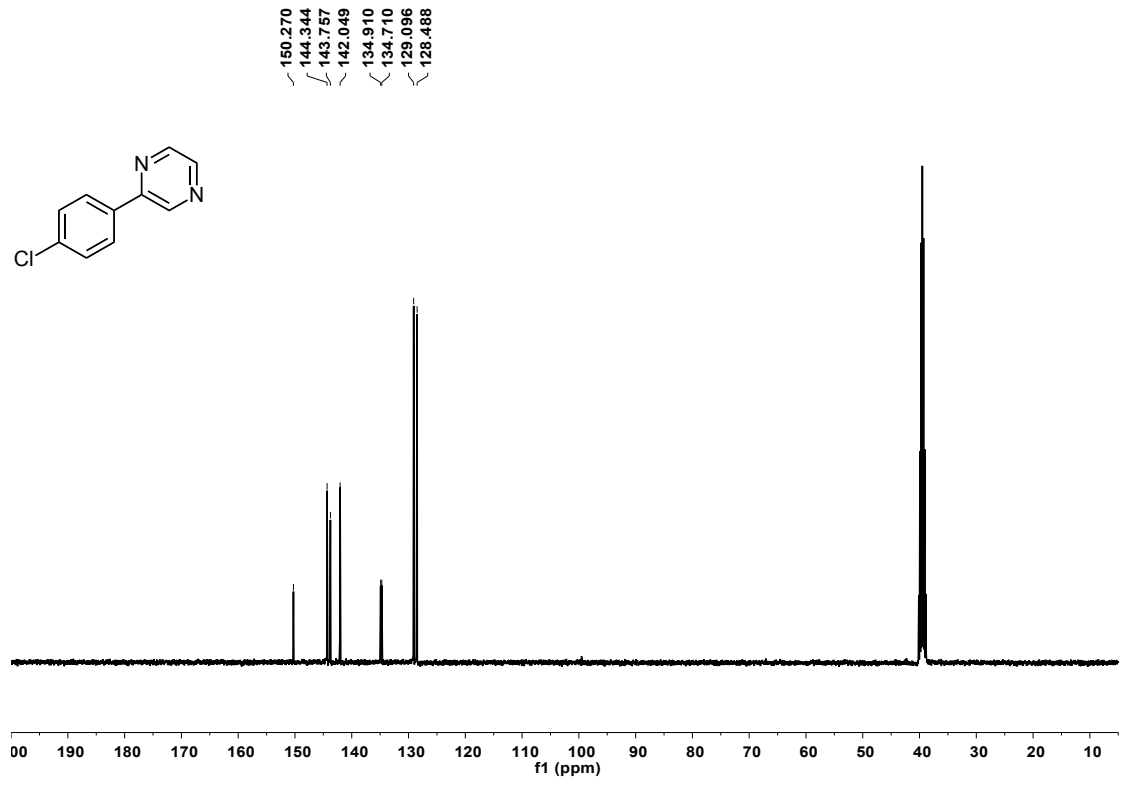

### 3fa

#### <sup>1</sup>H NMR

9.236  
9.232  
8.690  
8.687  
8.684  
8.680  
8.614  
8.607  
8.066  
8.059  
8.054  
8.043  
8.038  
8.031  
7.699  
7.693  
7.688  
7.676  
7.671  
7.665

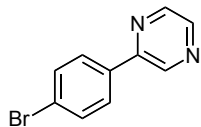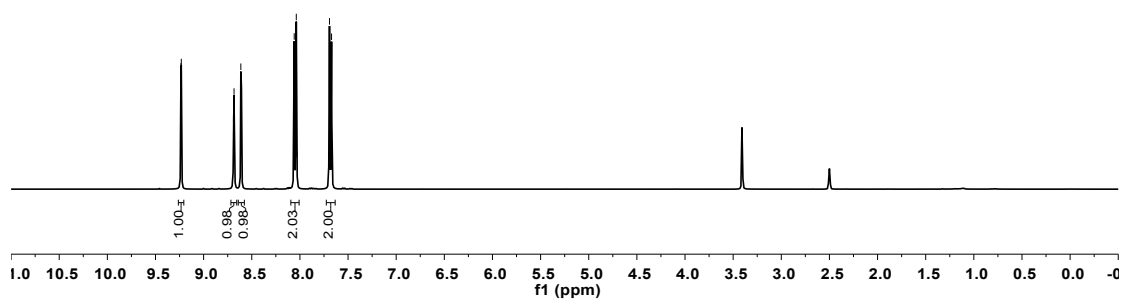

#### <sup>13</sup>C NMR

150.267  
144.258  
143.701  
141.911  
134.983  
131.914  
128.627  
123.678

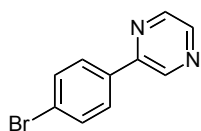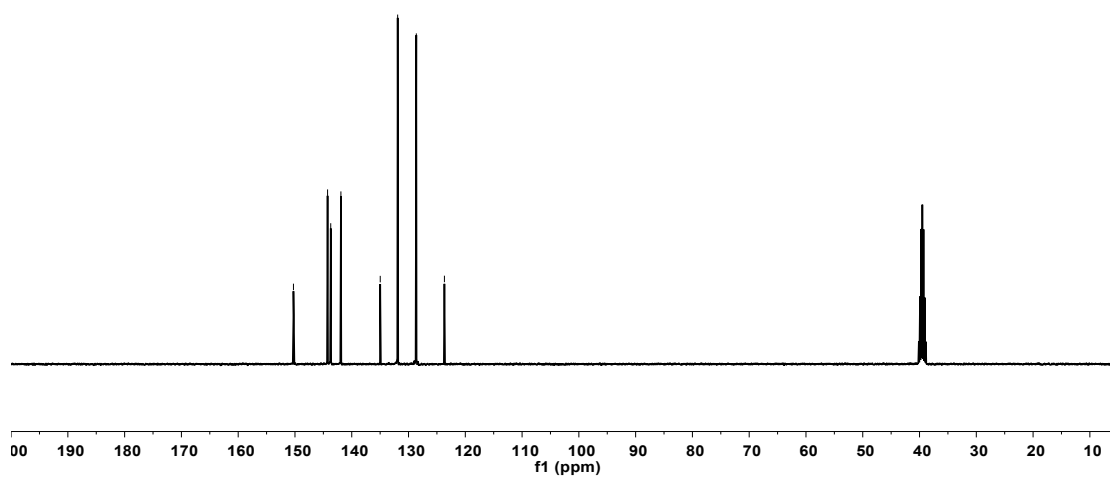

### 3ga

#### <sup>1</sup>H NMR

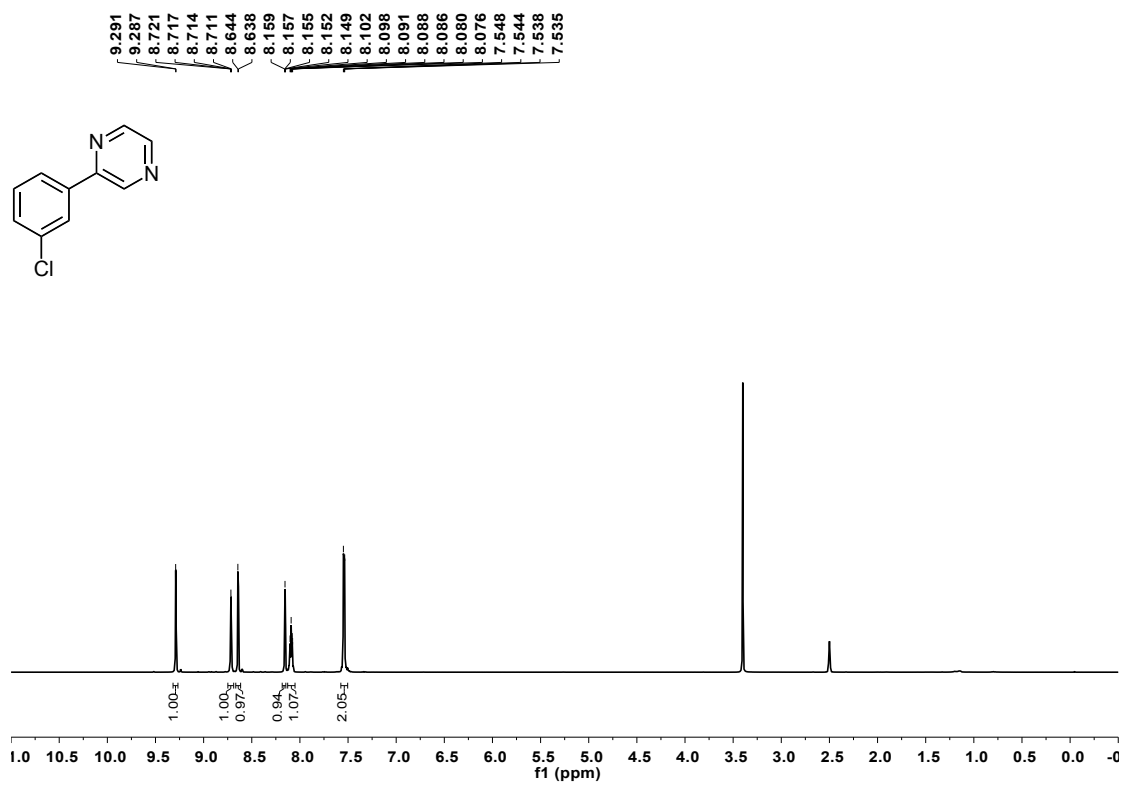

#### <sup>13</sup>C NMR

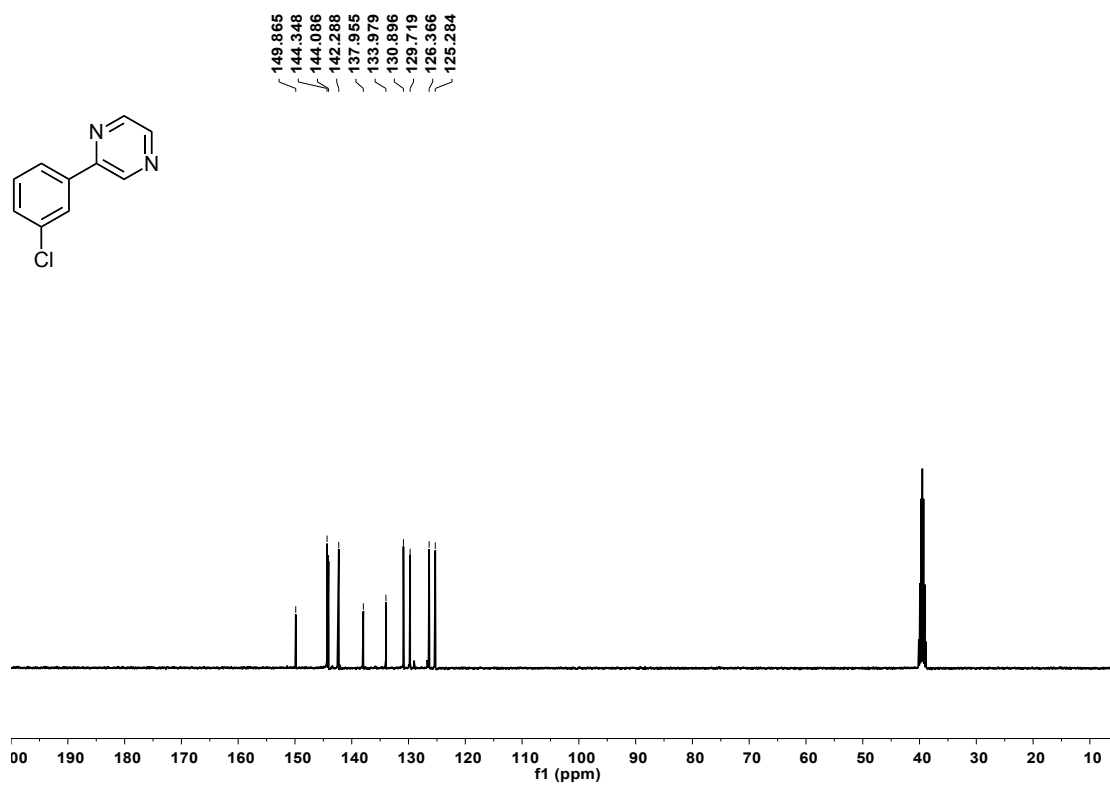



### 3ha

#### <sup>1</sup>H NMR

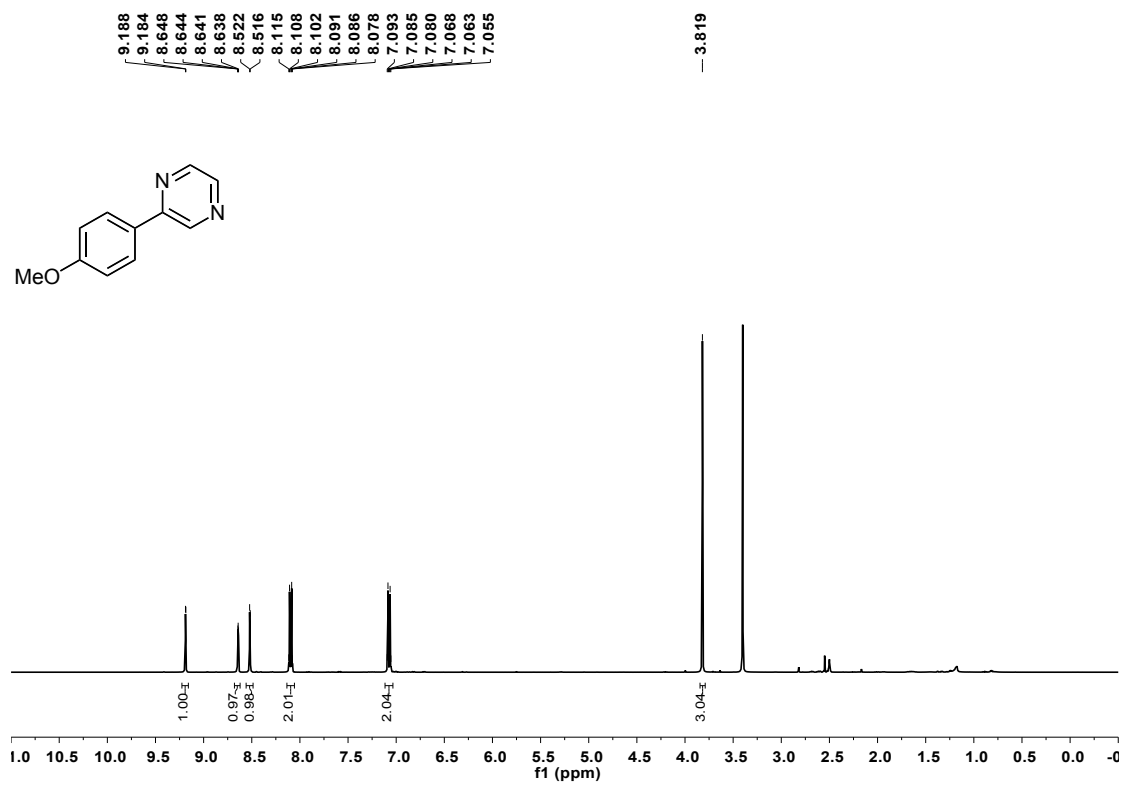

#### <sup>13</sup>C NMR

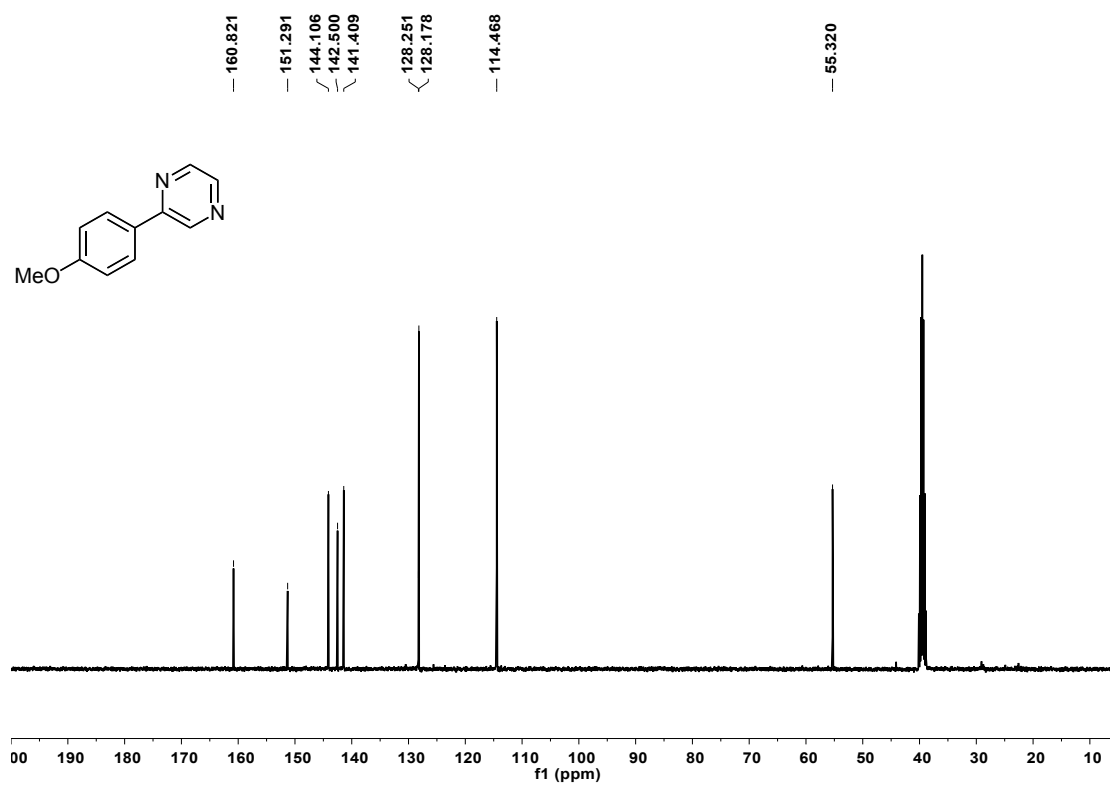

### 3ia

#### <sup>1</sup>H NMR

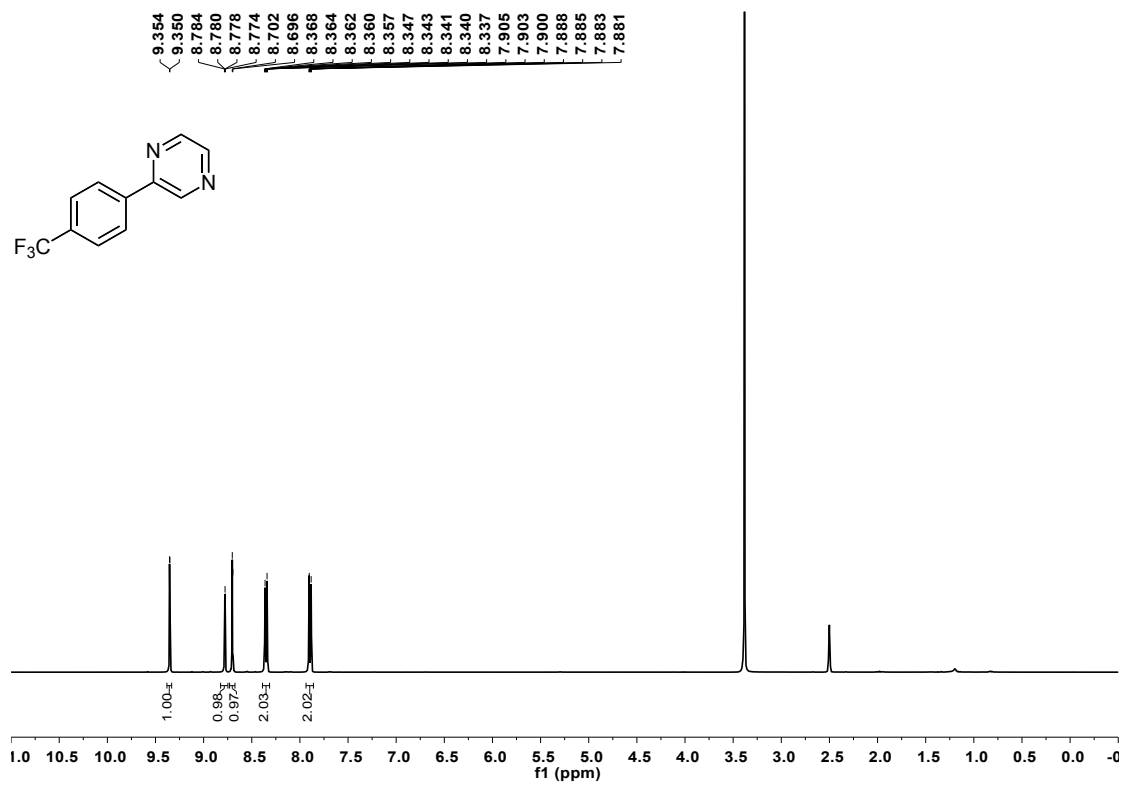

#### <sup>13</sup>C NMR

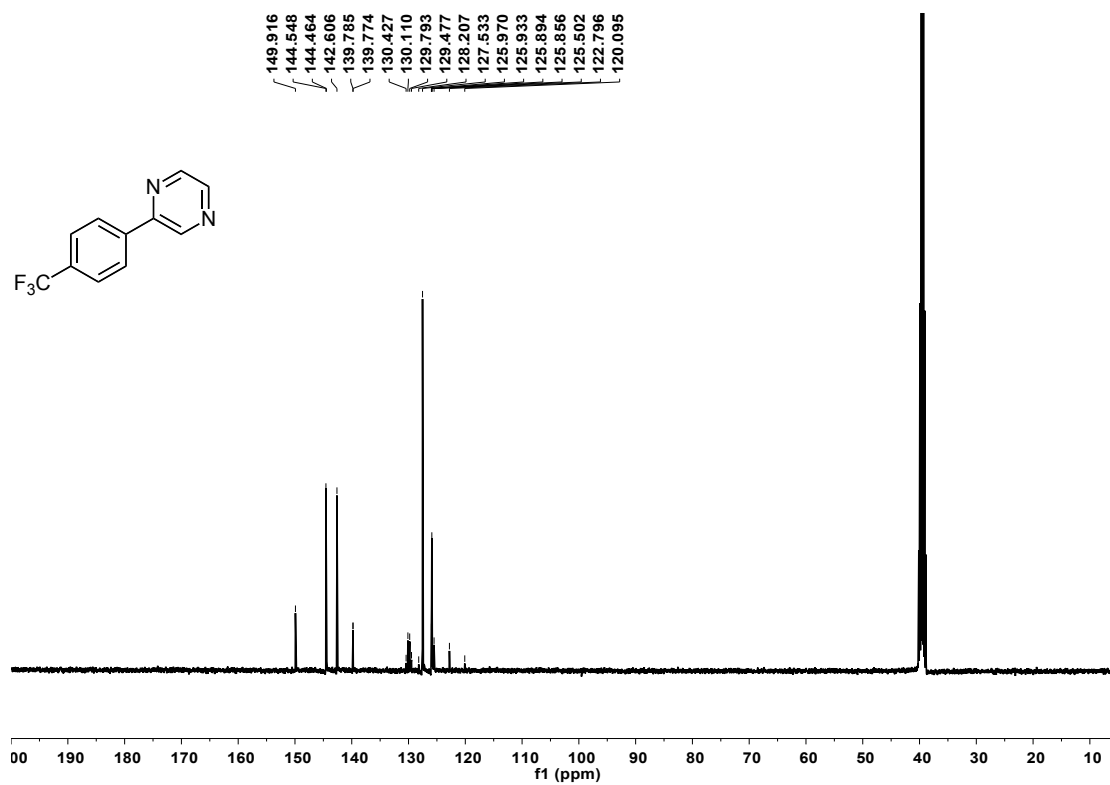

**<sup>19</sup>F NMR**

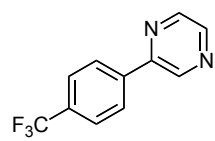

— -61.244

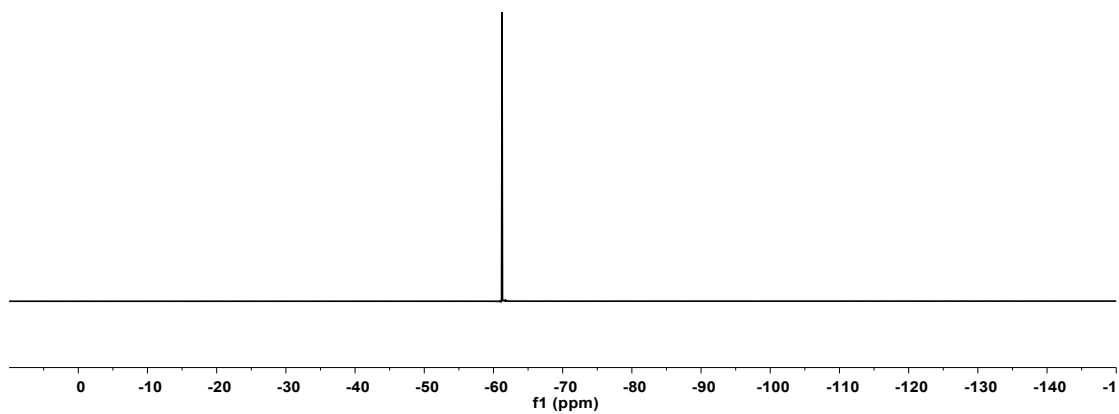

3ja

<sup>1</sup>H NMR

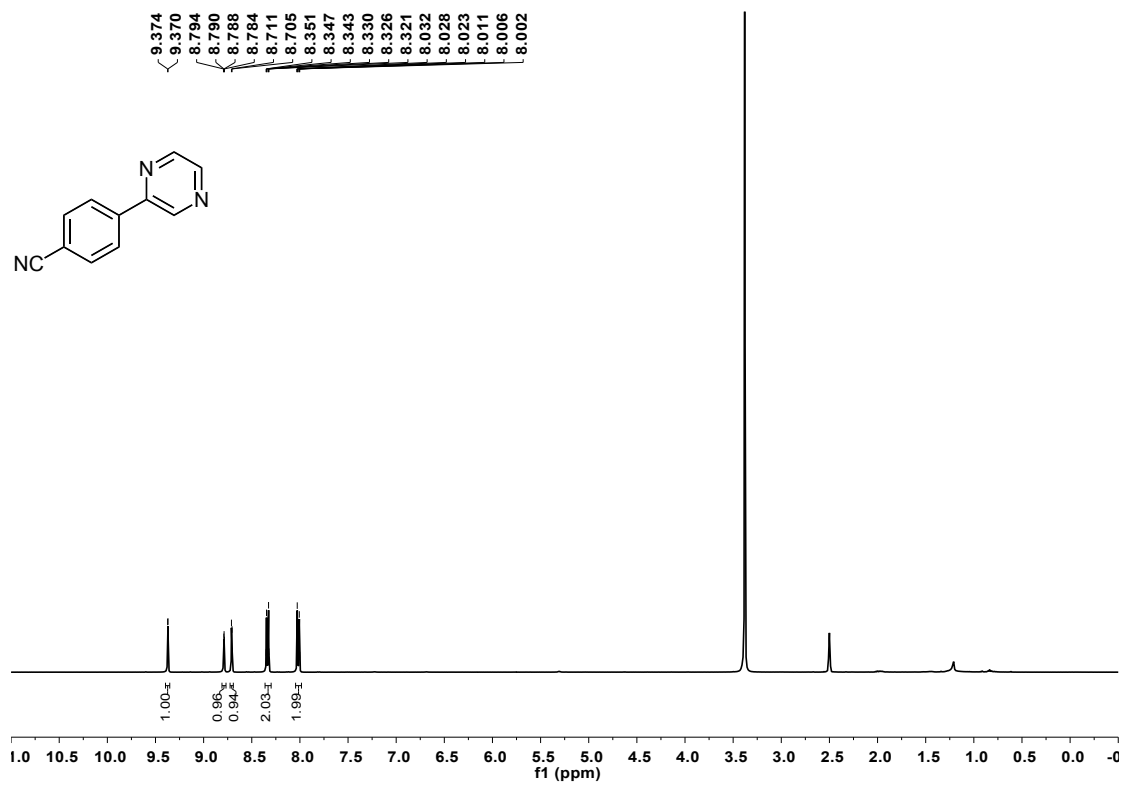

<sup>13</sup>C NMR

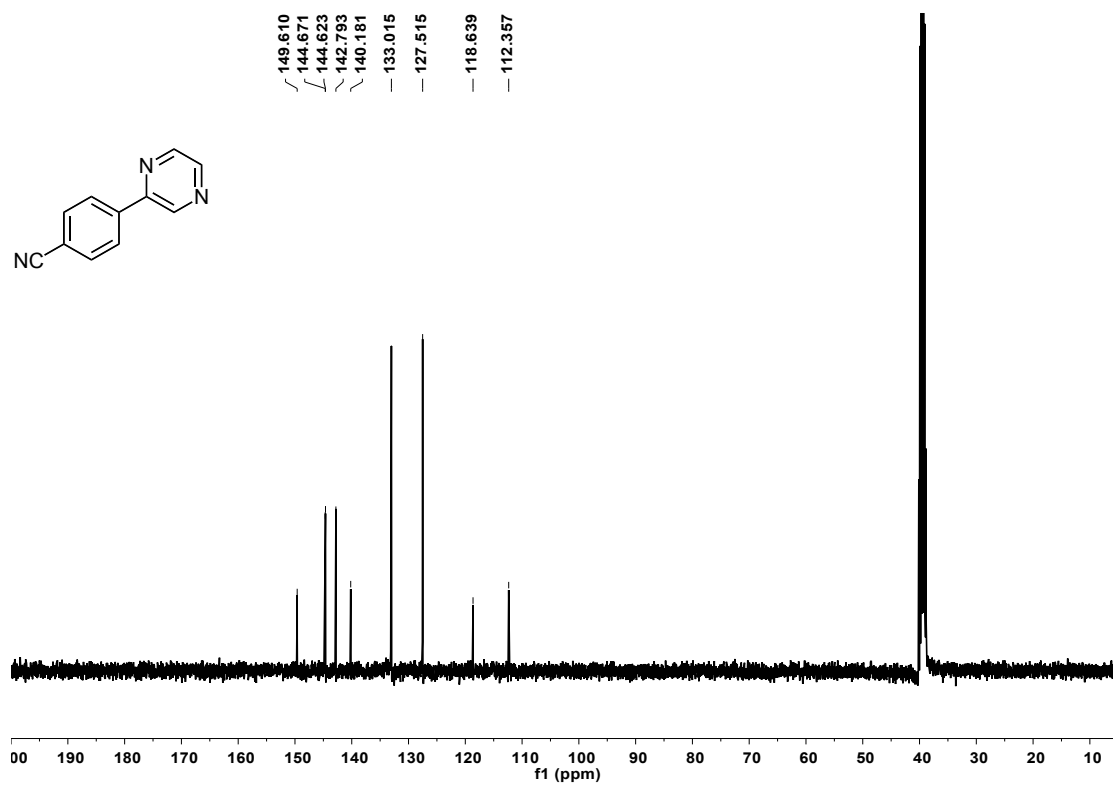

### 3ka

#### <sup>1</sup>H NMR

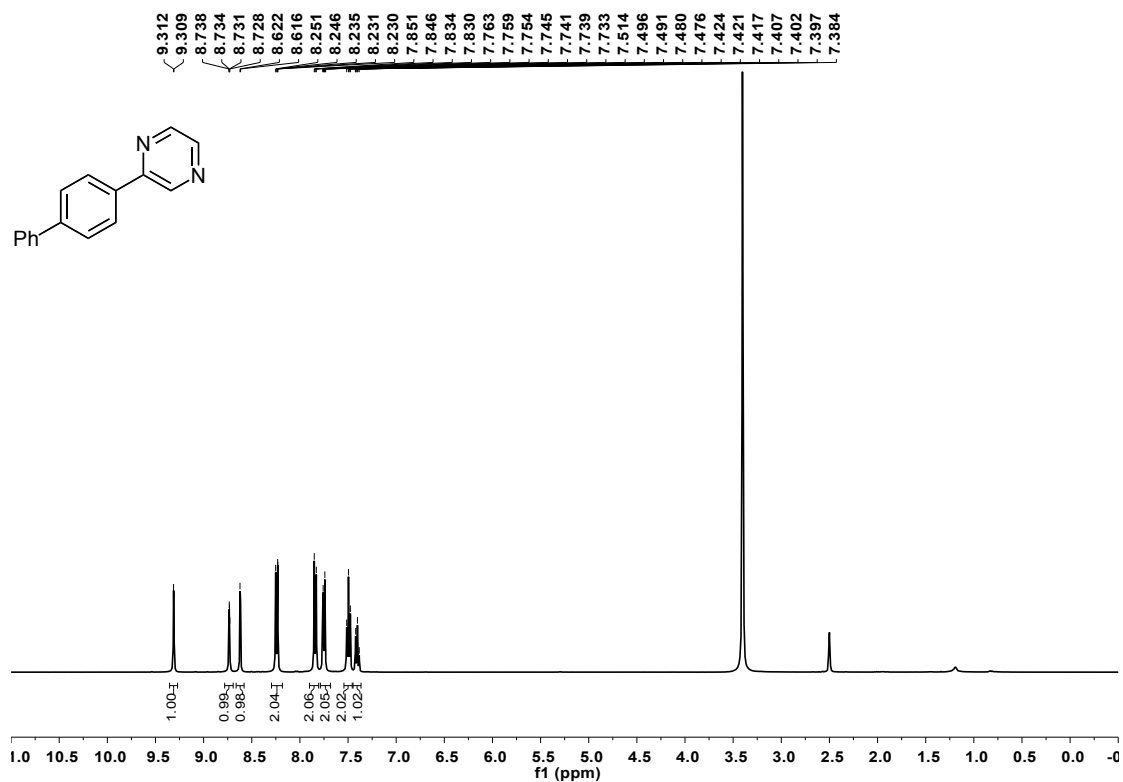

#### <sup>13</sup>C NMR

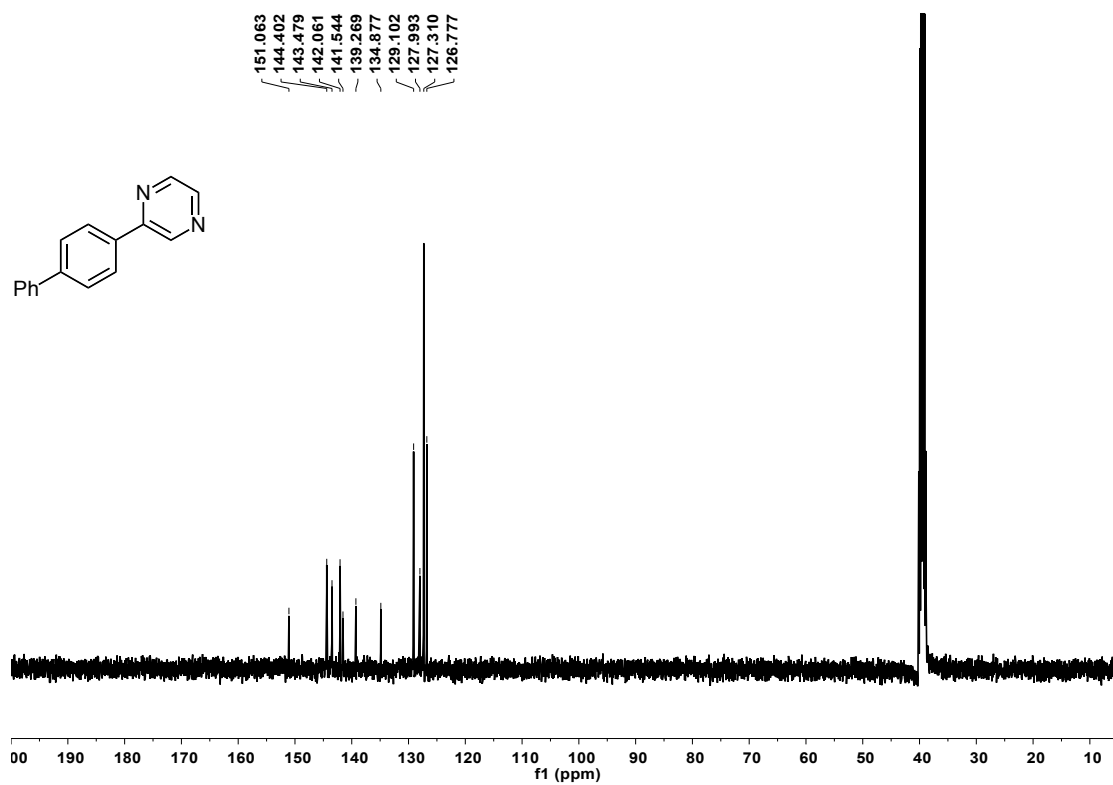

### 3la

#### <sup>1</sup>H NMR

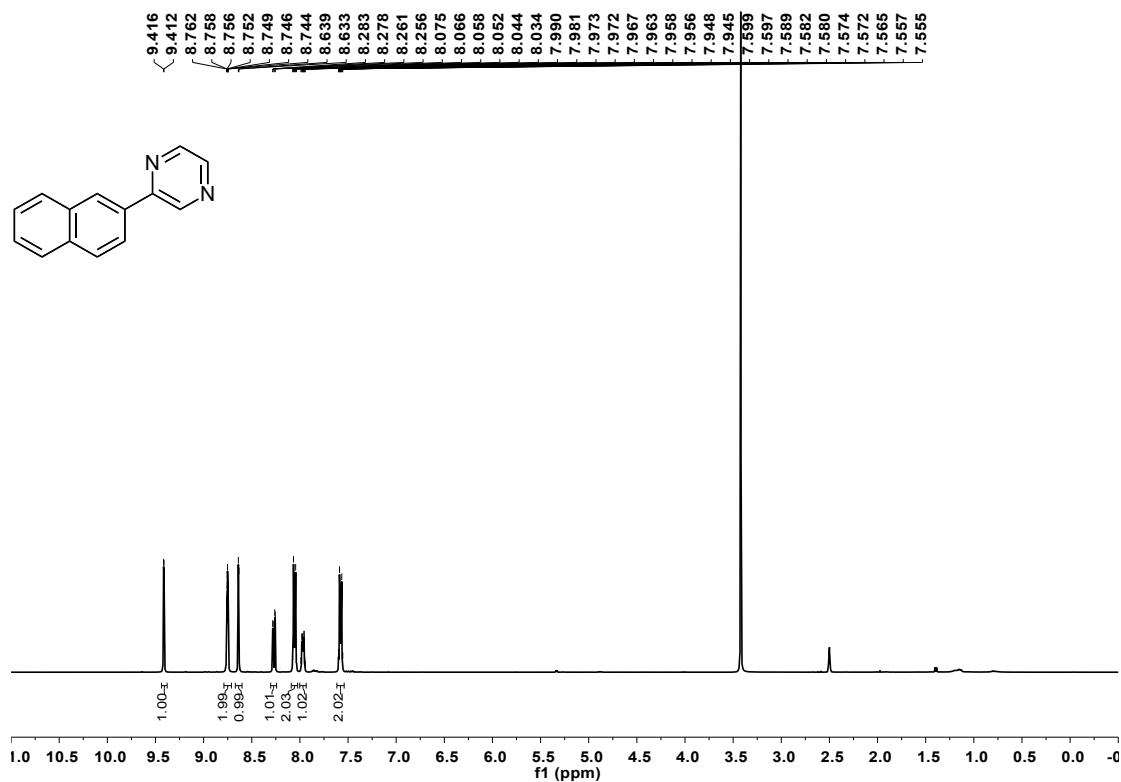

#### <sup>13</sup>C NMR

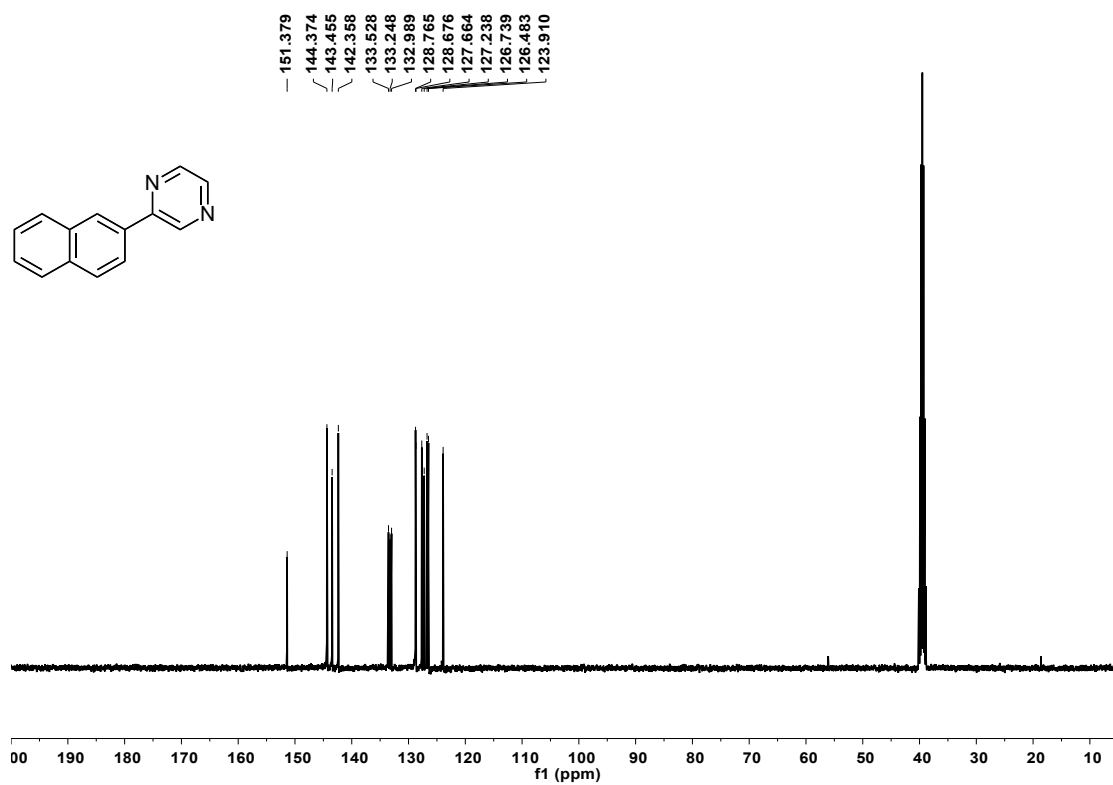

### 3ma

### <sup>1</sup>H NMR

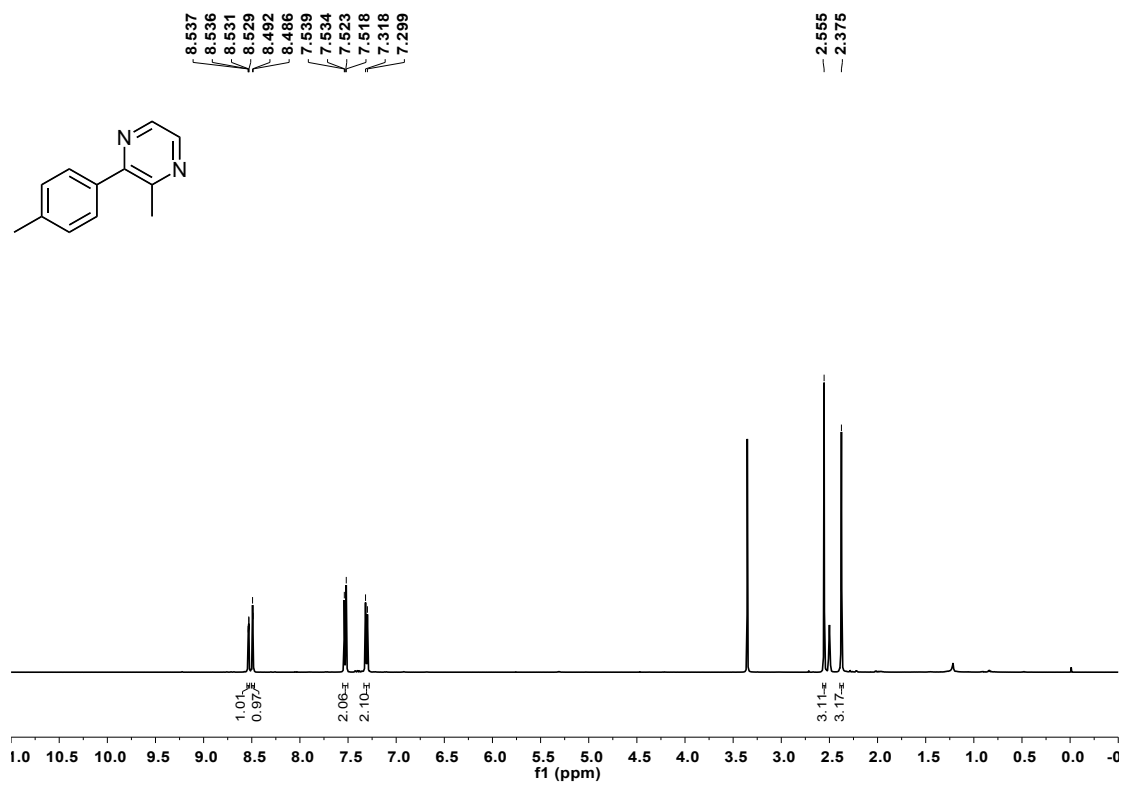

### <sup>13</sup>C NMR

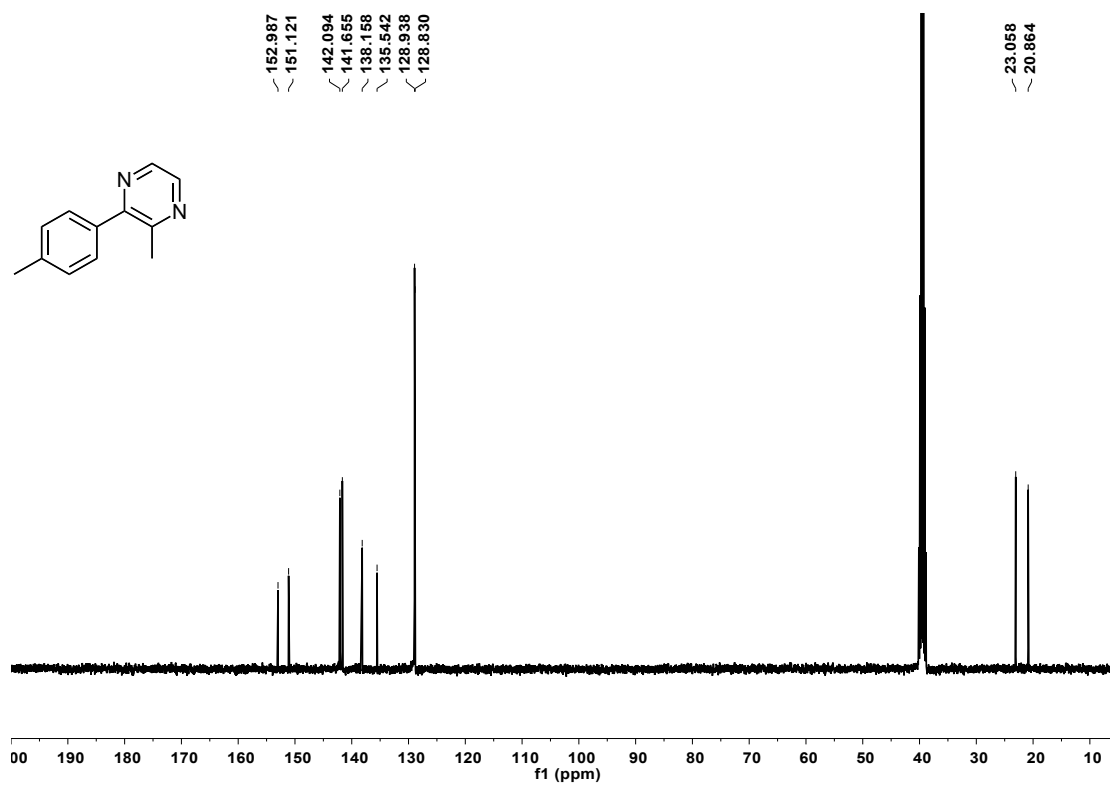

### 3na

#### <sup>1</sup>H NMR

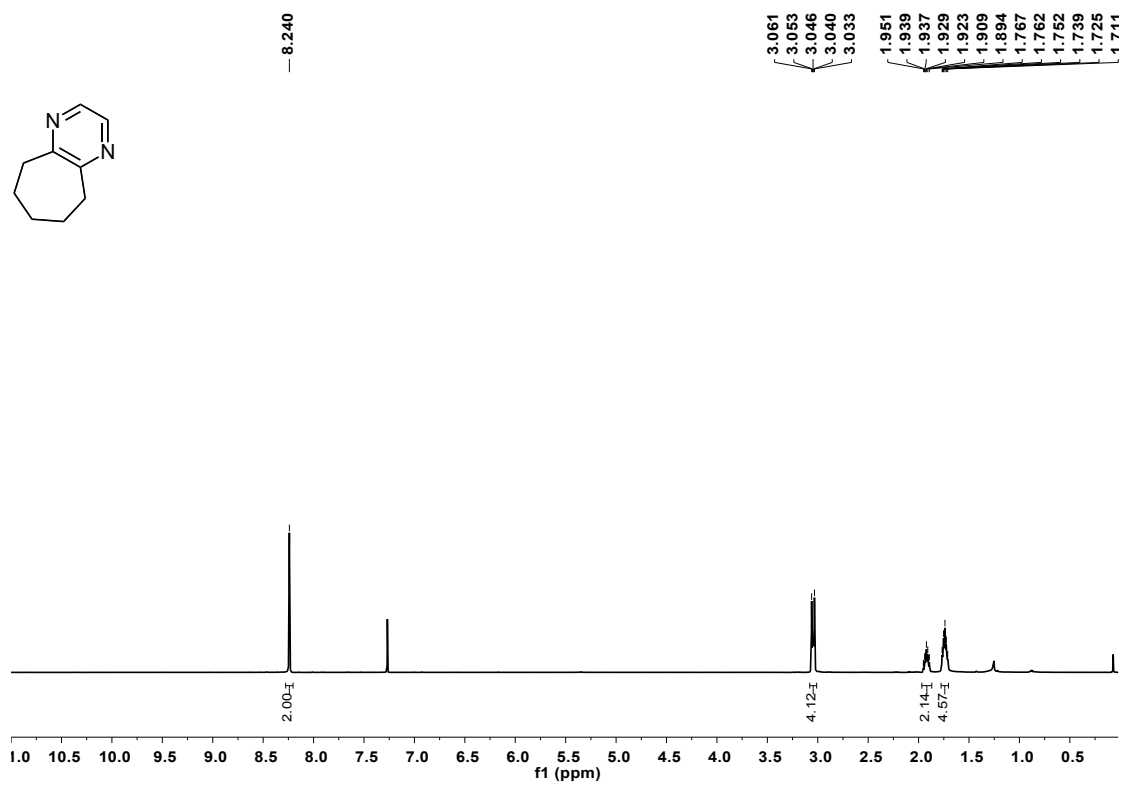

#### <sup>13</sup>C NMR

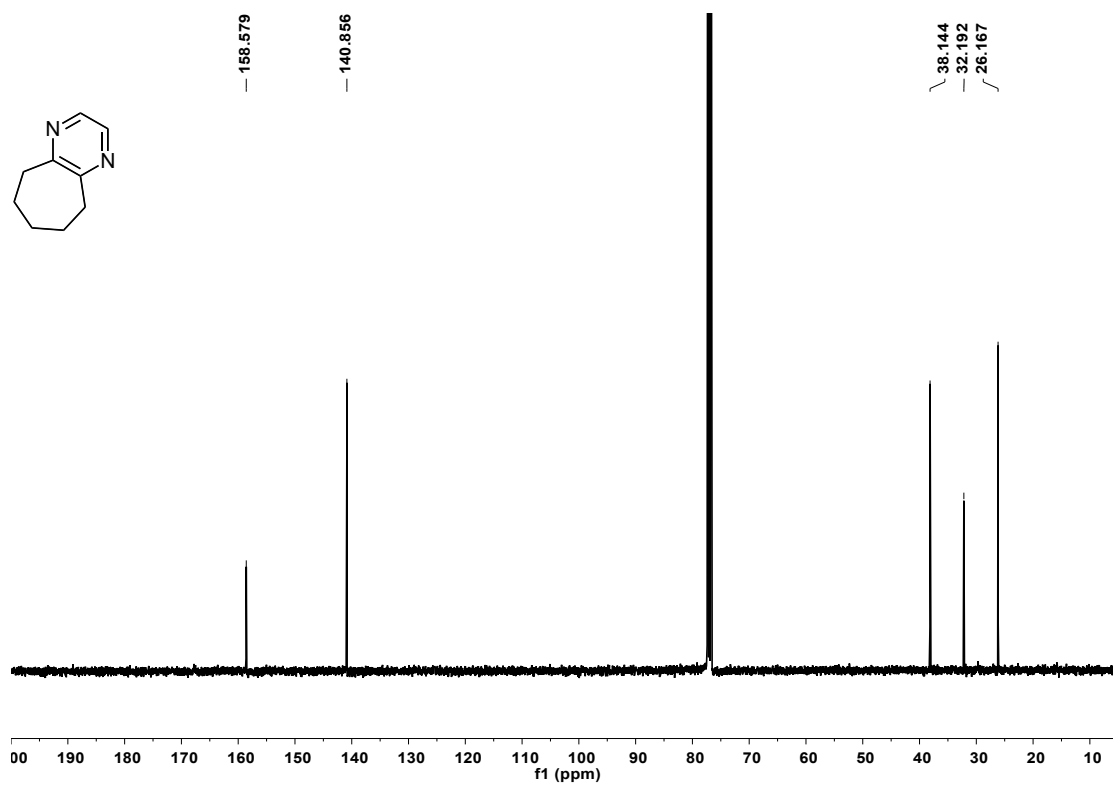



### 30a

#### <sup>1</sup>H NMR

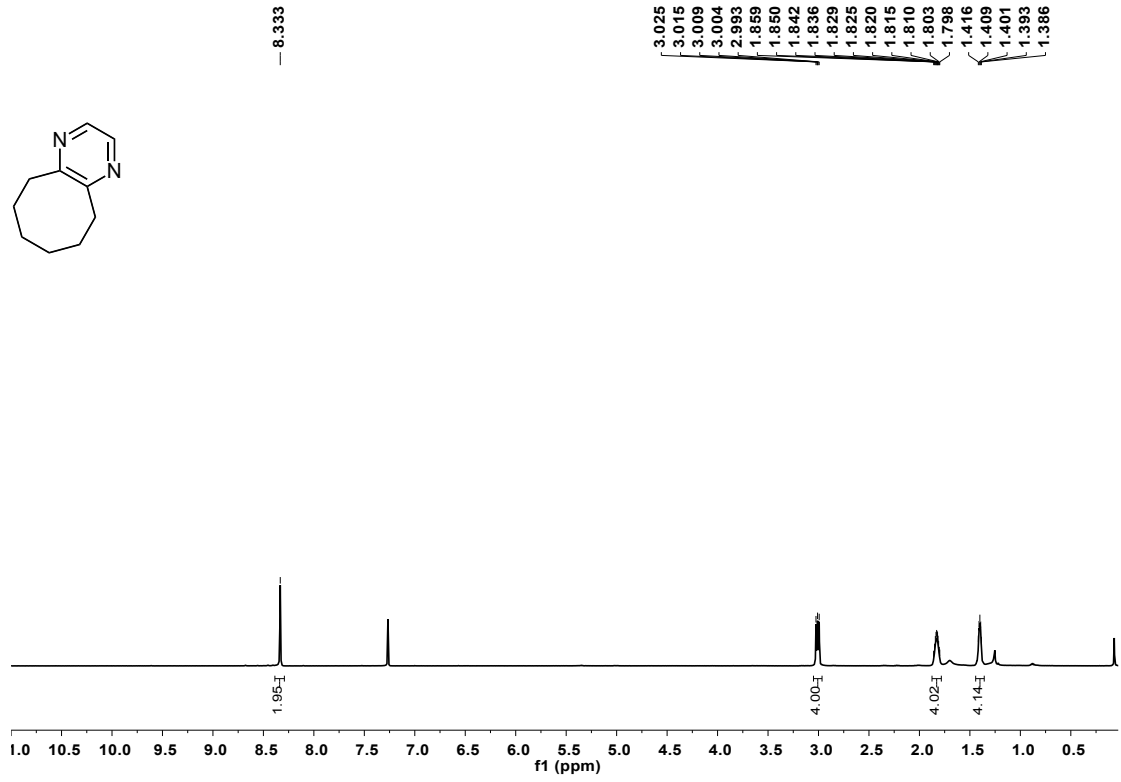

#### <sup>13</sup>C NMR

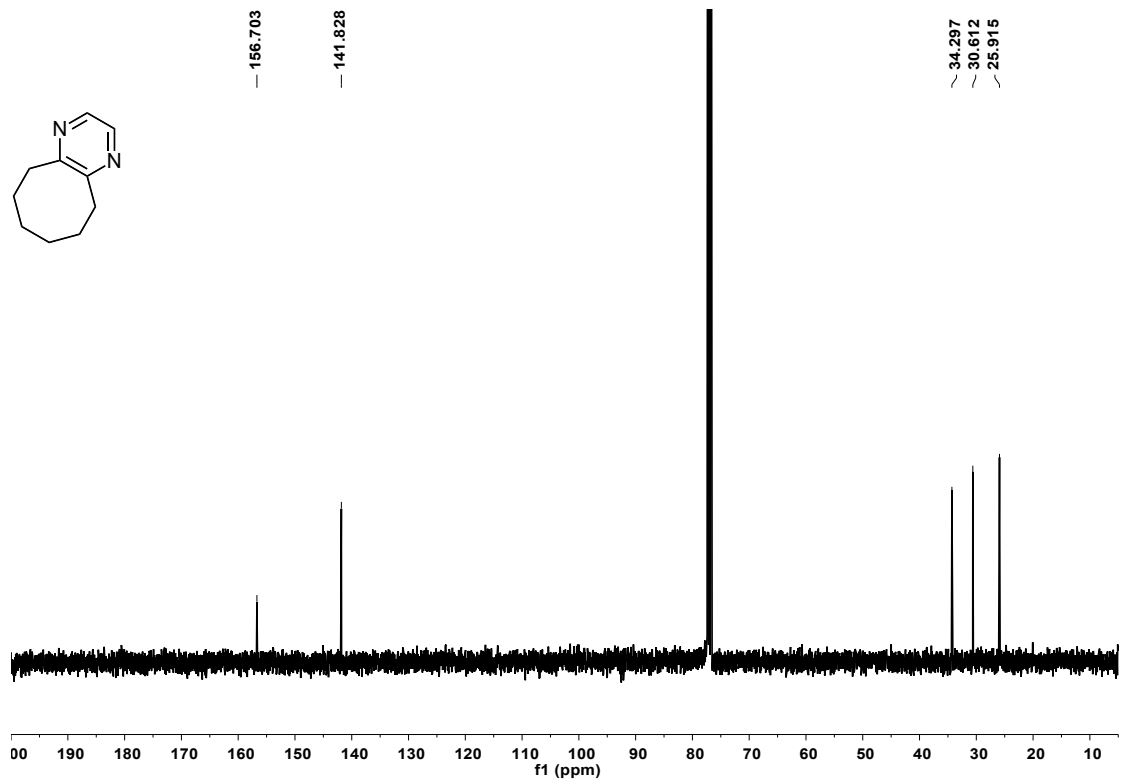

### 3ab

#### <sup>1</sup>H NMR

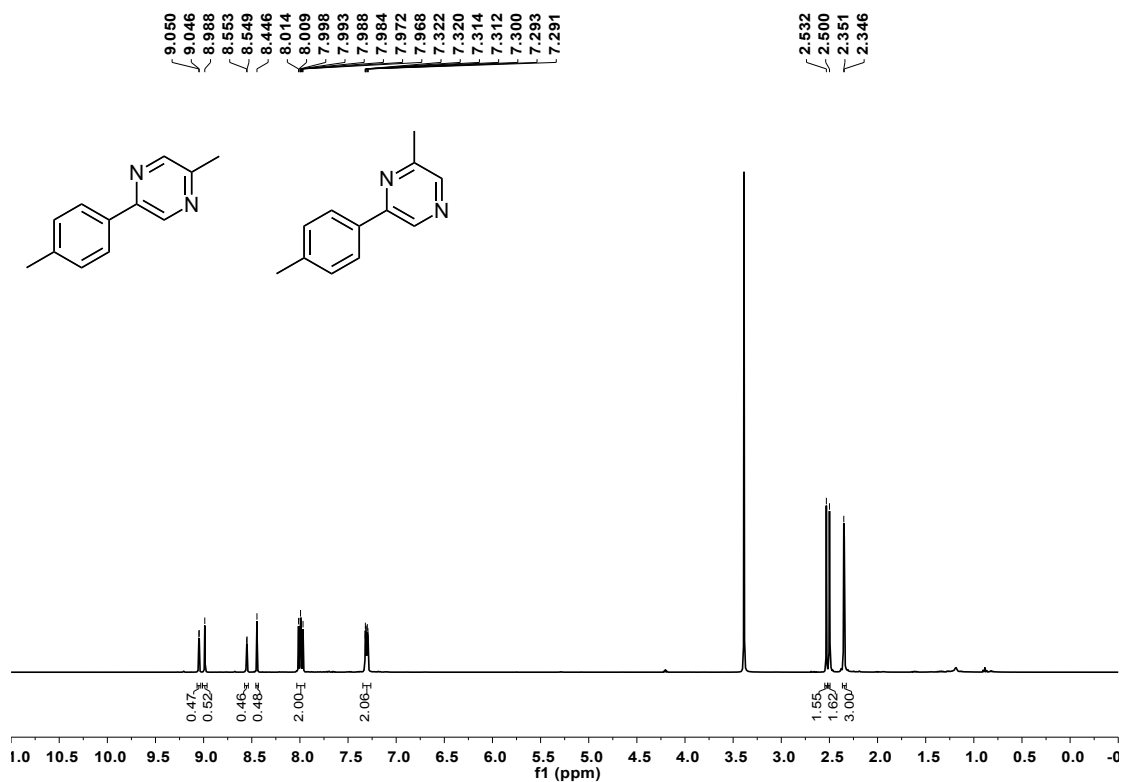

#### <sup>13</sup>C NMR

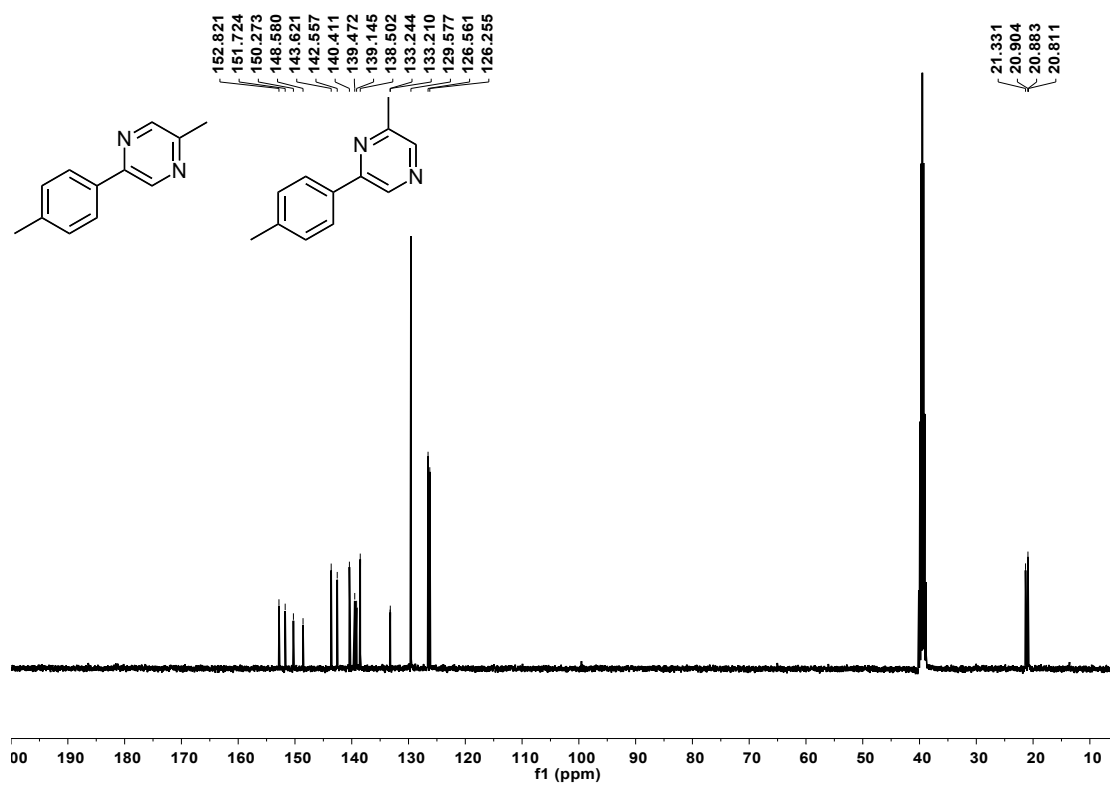

### 3ac

### <sup>1</sup>H NMR

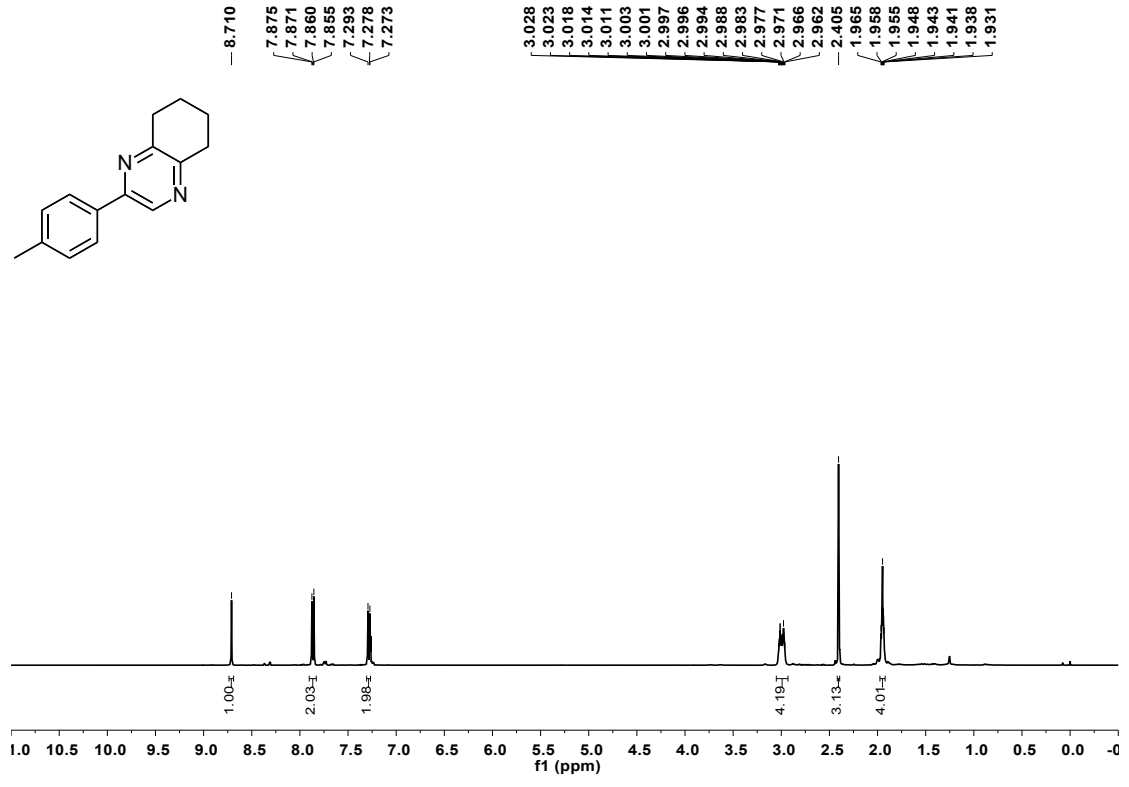

### <sup>13</sup>C NMR

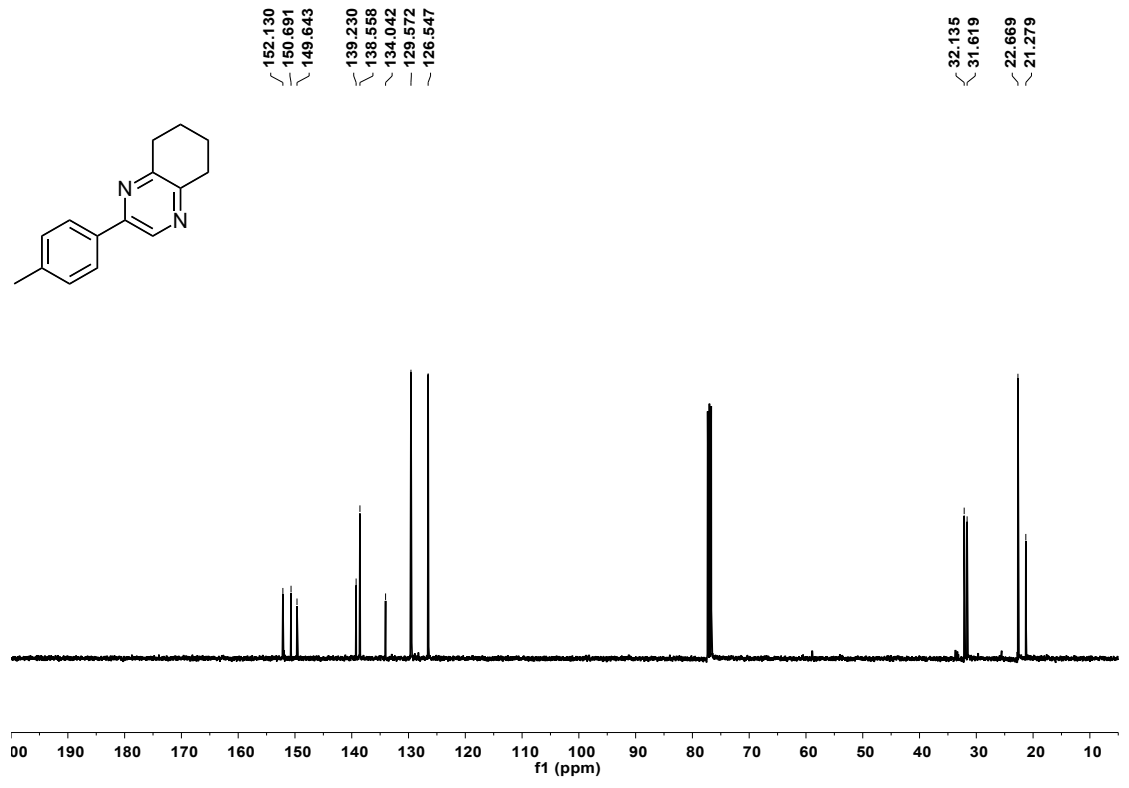

### 3ad

#### <sup>1</sup>H NMR

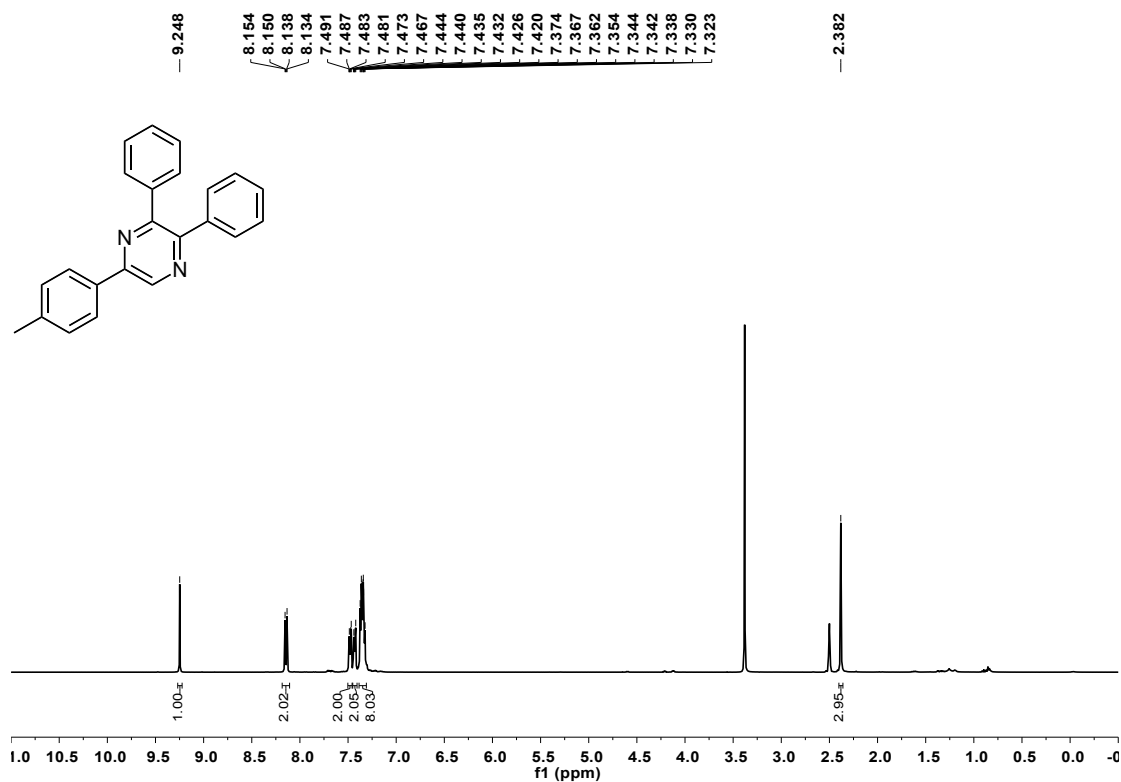

#### <sup>13</sup>C NMR

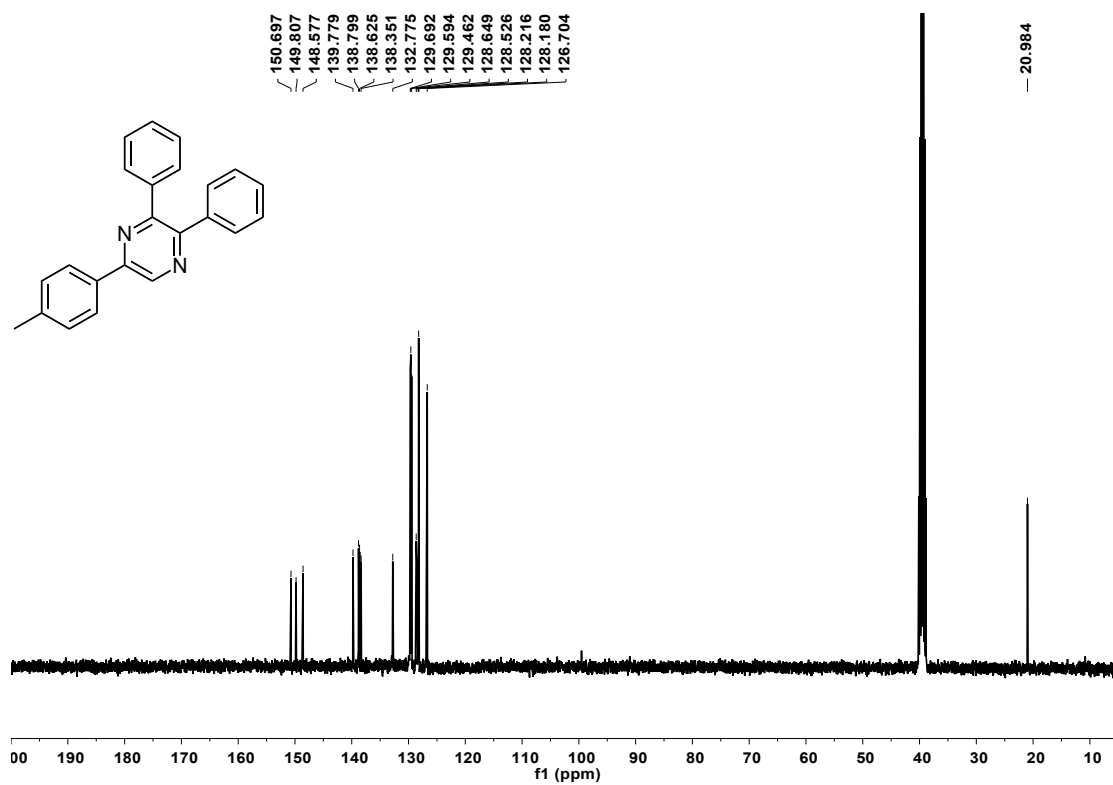

### 3pa

#### <sup>1</sup>H NMR

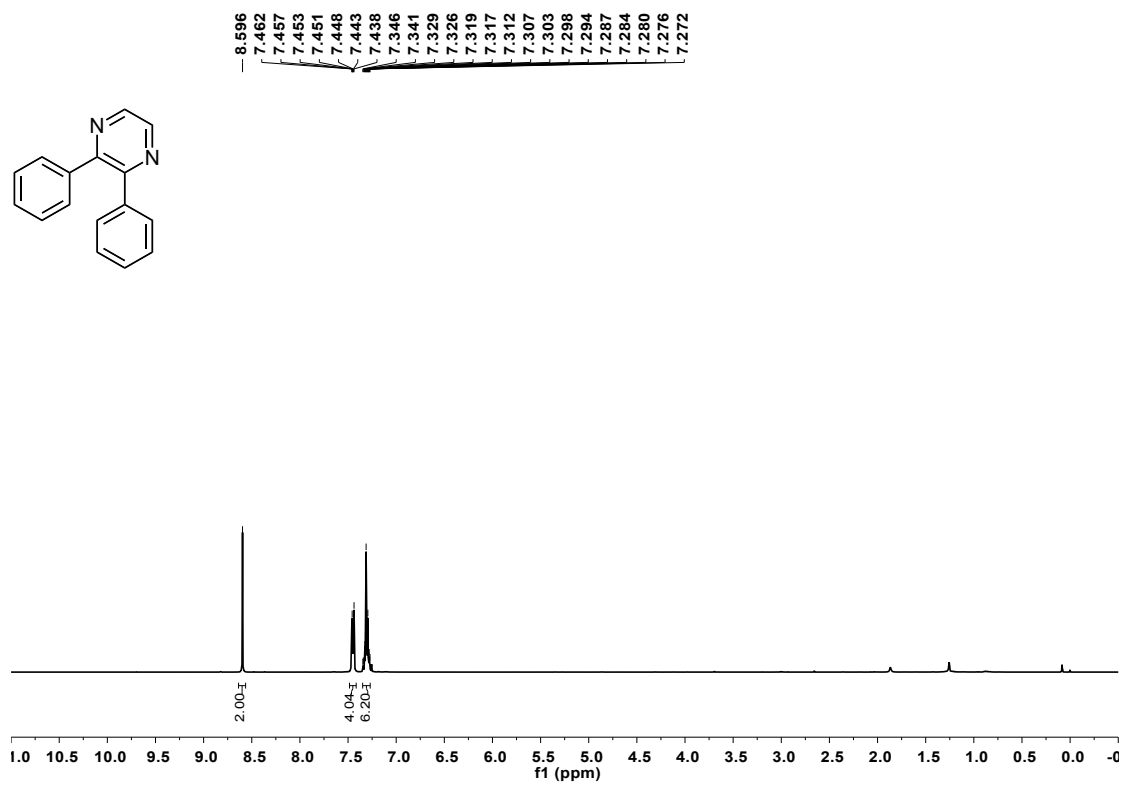

#### <sup>13</sup>C NMR

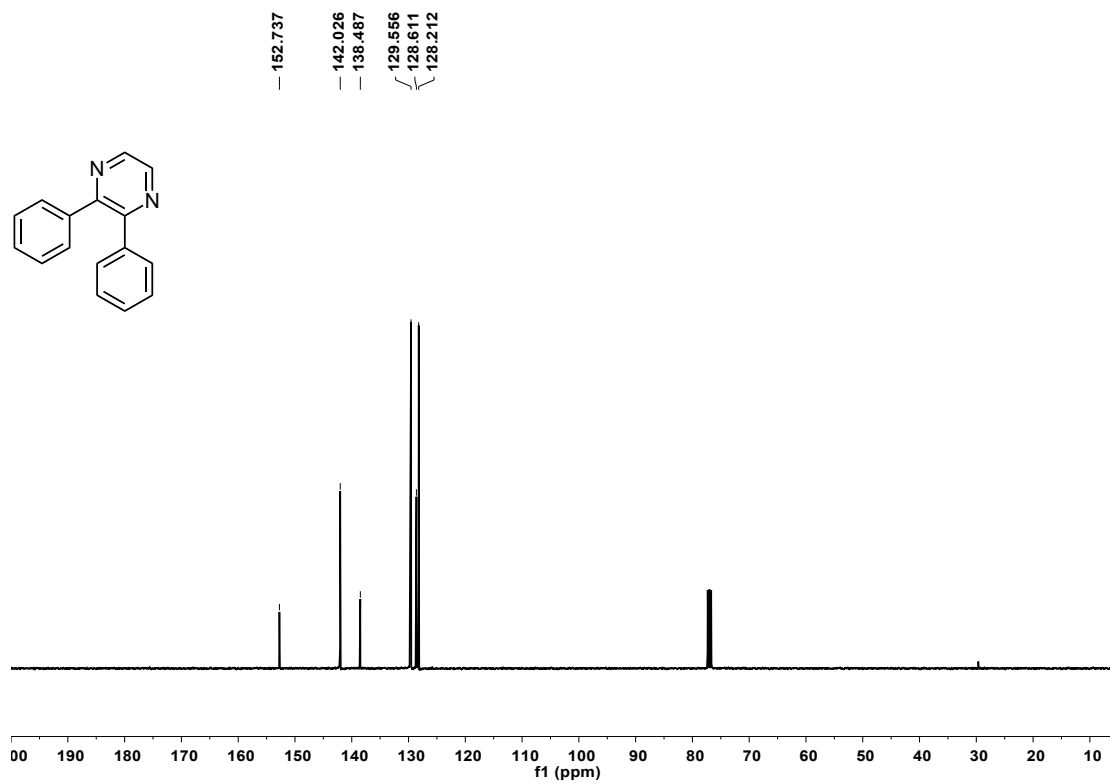

### 3qa

#### <sup>1</sup>H NMR

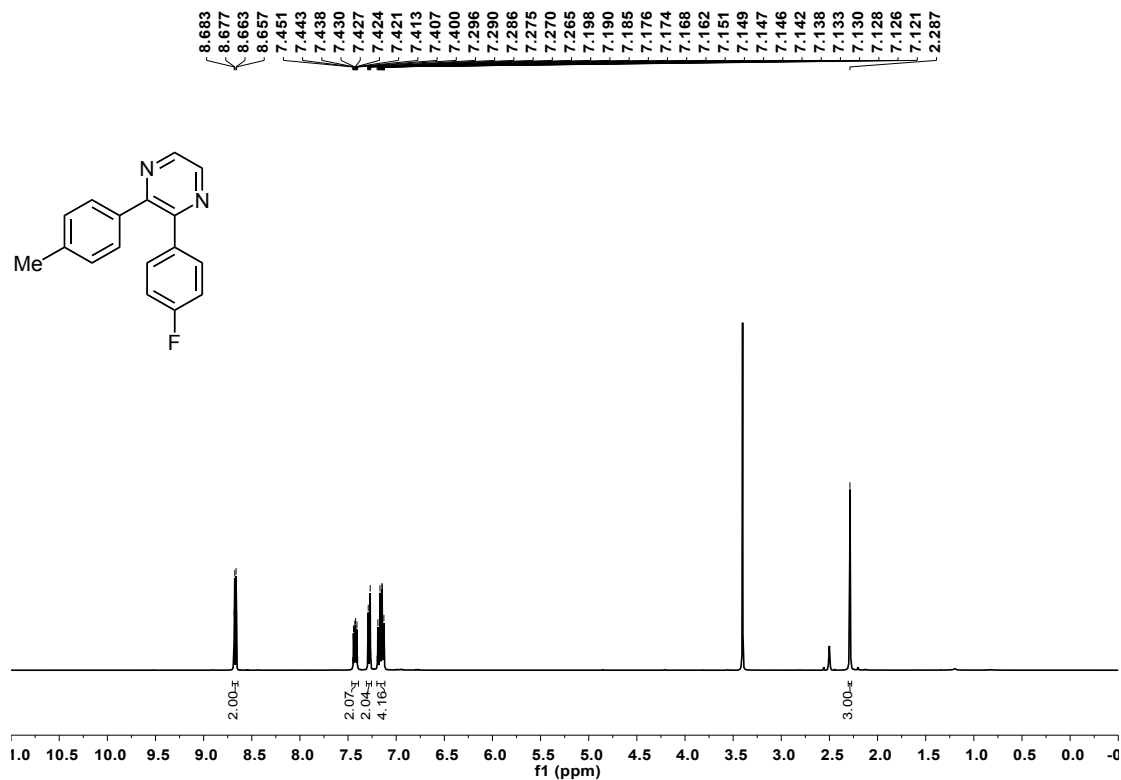

#### <sup>13</sup>C NMR

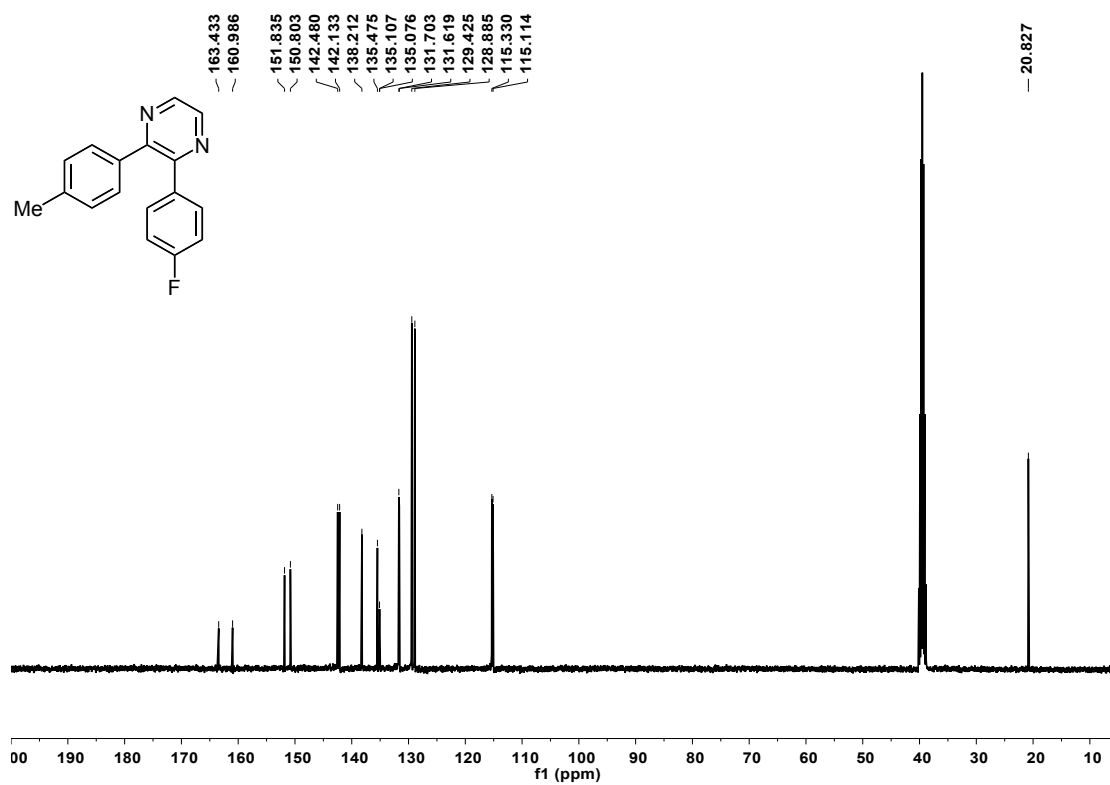

**<sup>19</sup>F NMR**

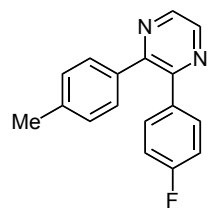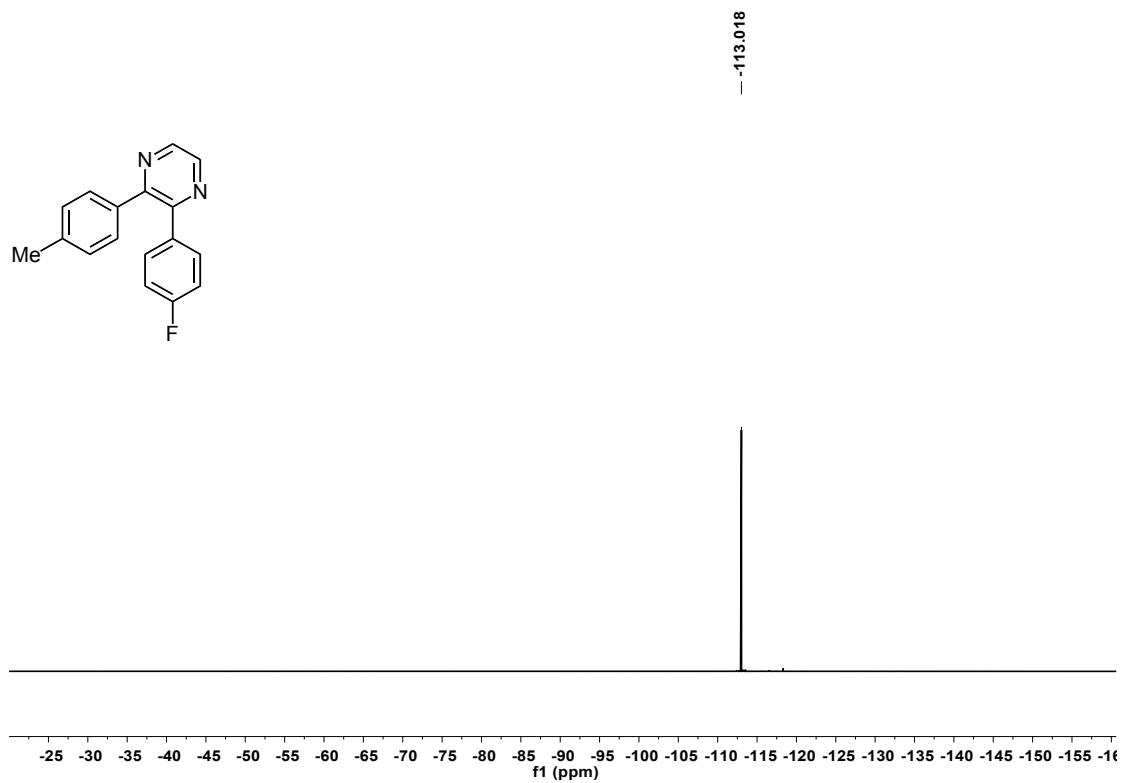

### 3ra

#### <sup>1</sup>H NMR

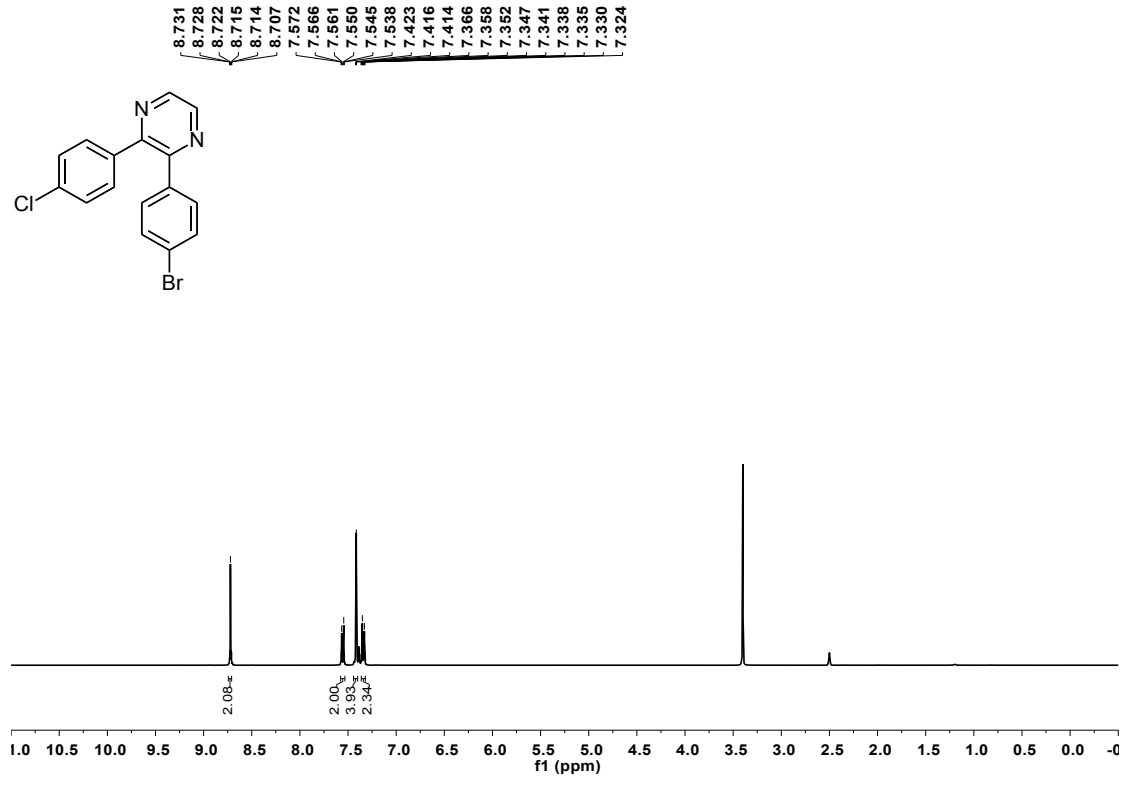

#### <sup>13</sup>C NMR

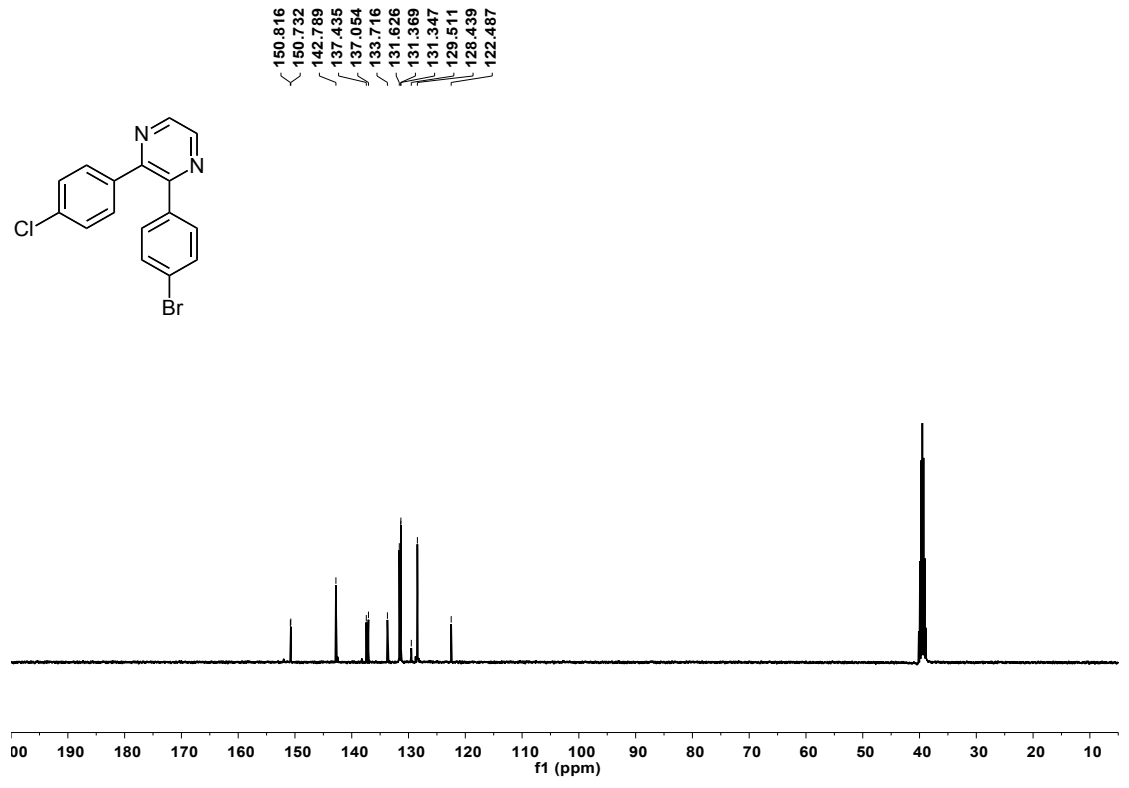



### 3sa

#### <sup>1</sup>H NMR

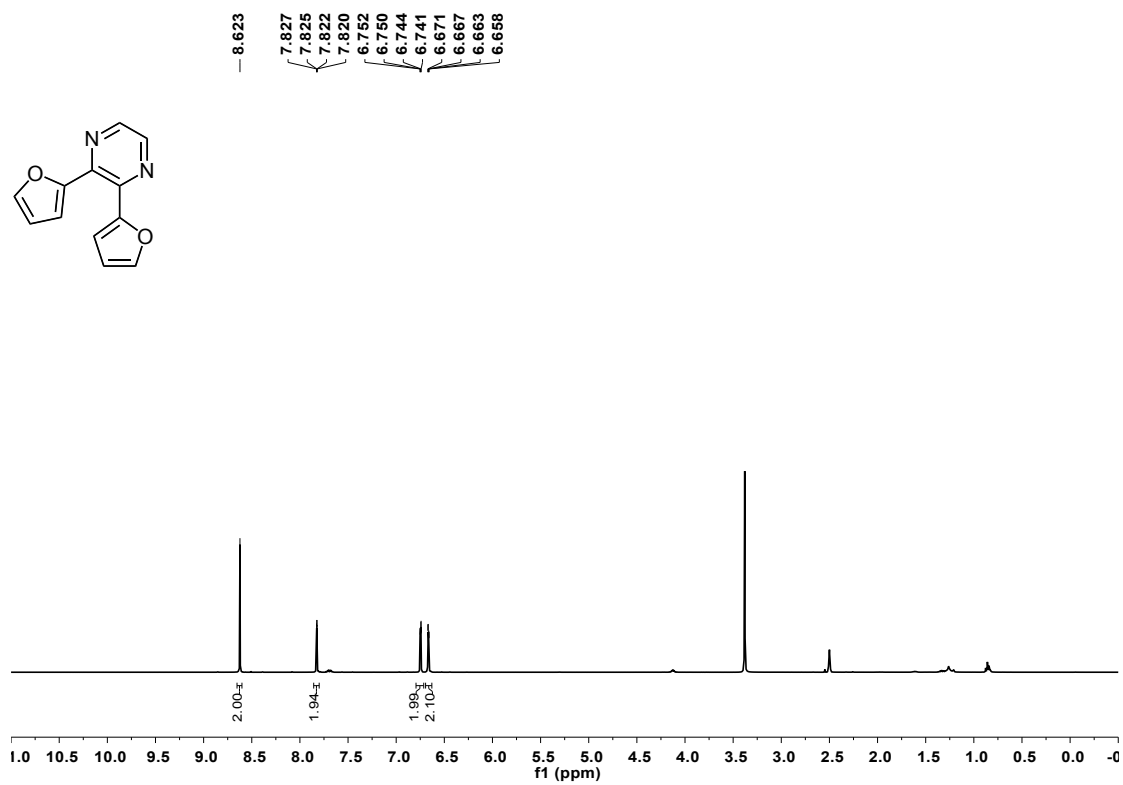

#### <sup>13</sup>C NMR

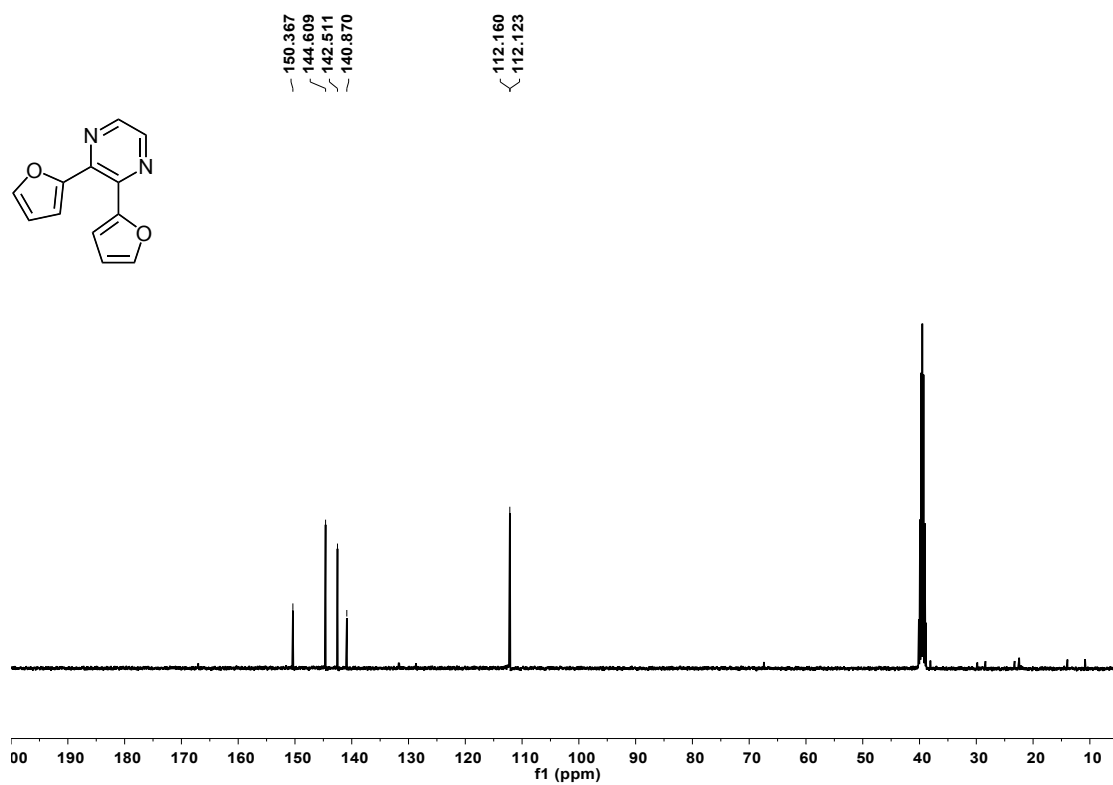

### 3ta

#### <sup>1</sup>H NMR

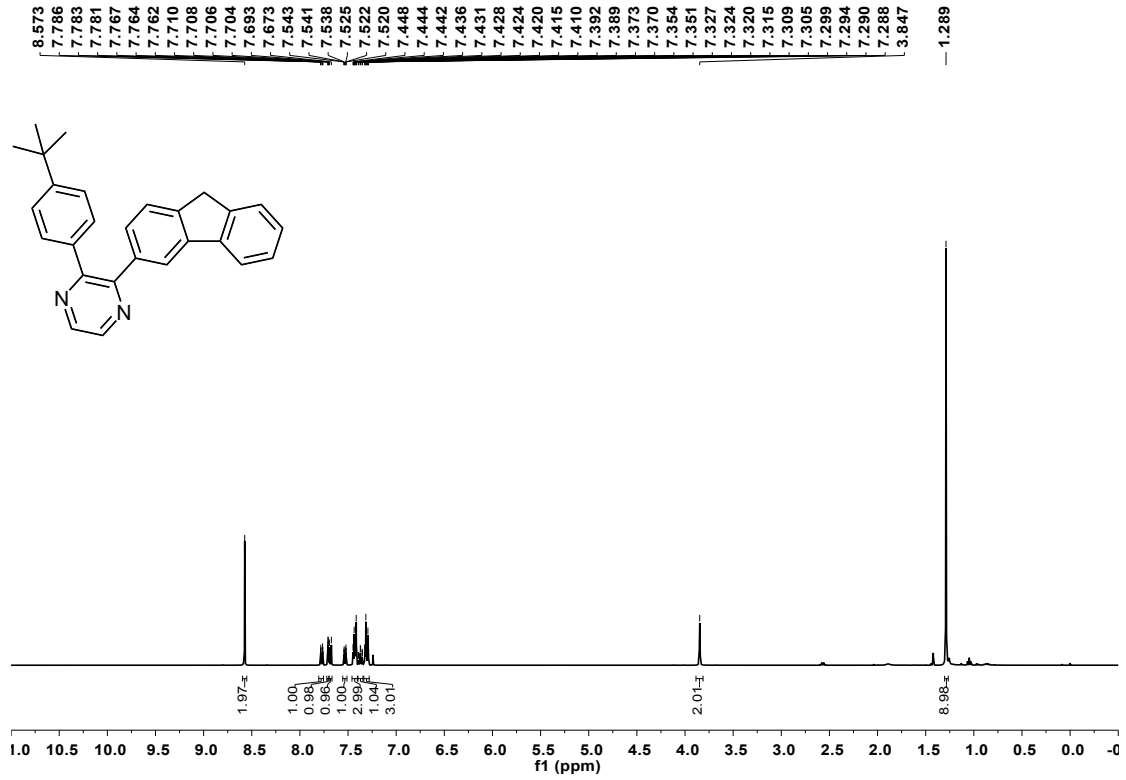

#### <sup>13</sup>C NMR

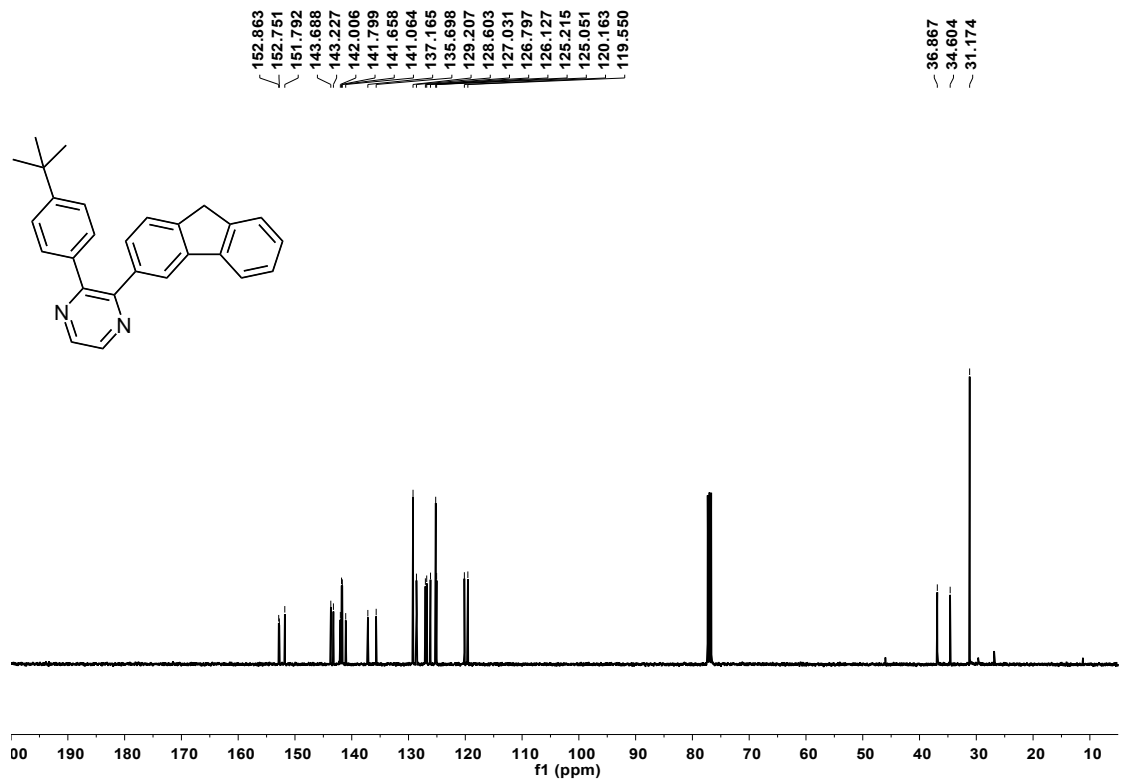

### 3ua

#### <sup>1</sup>H NMR

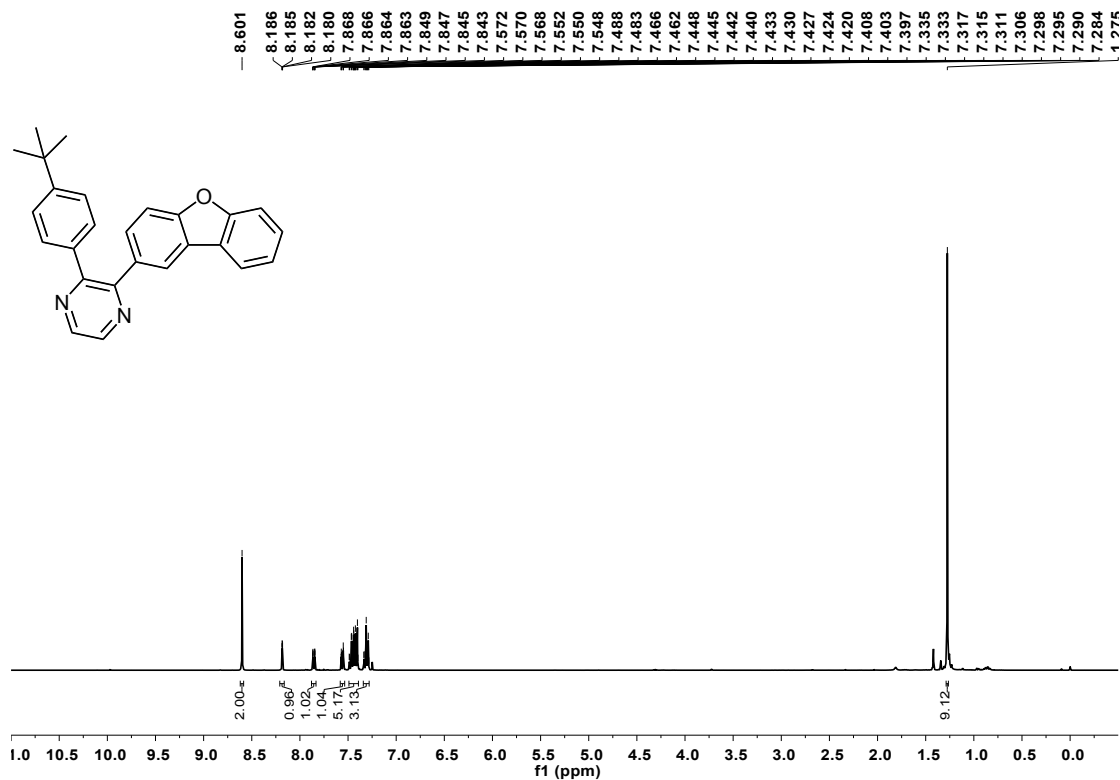

#### <sup>13</sup>C NMR

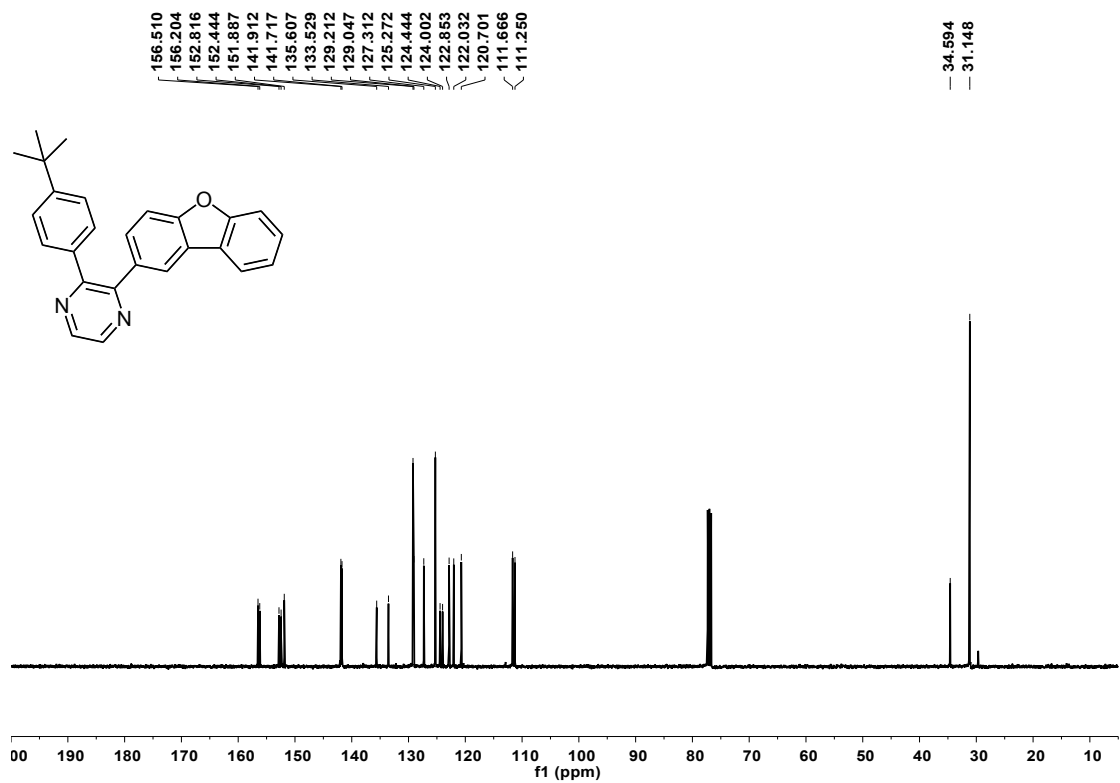

### 3va

#### <sup>1</sup>H NMR

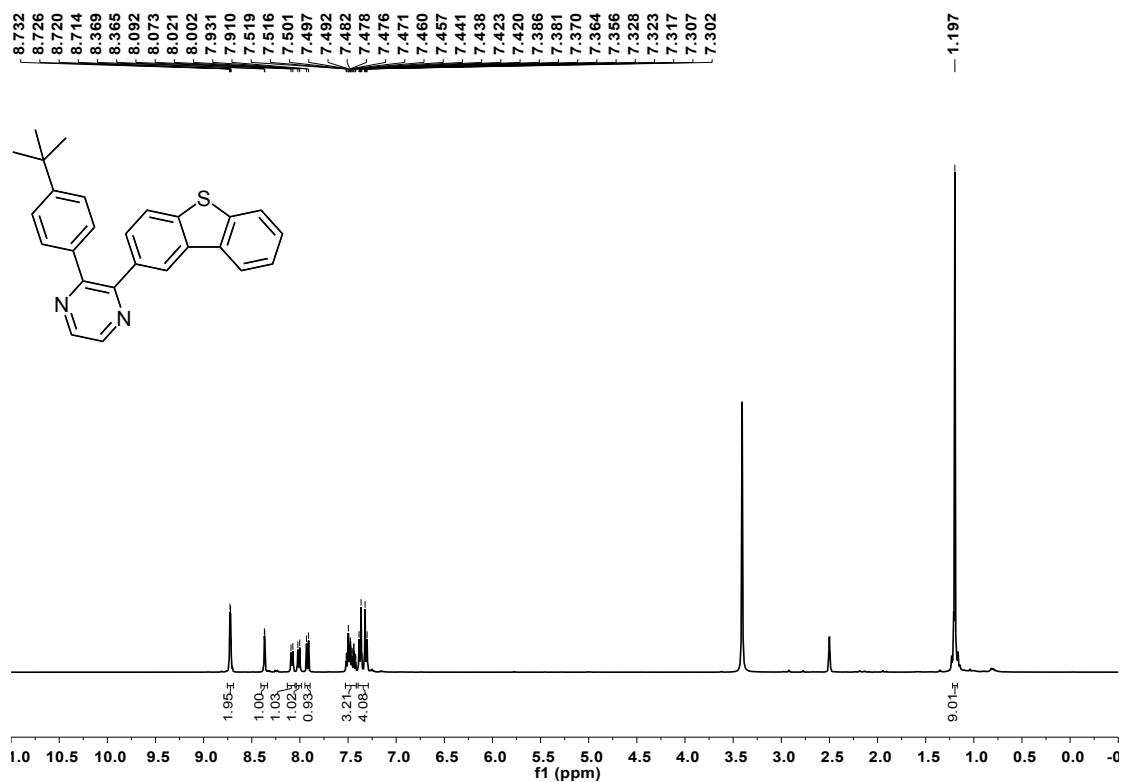

#### <sup>13</sup>C NMR

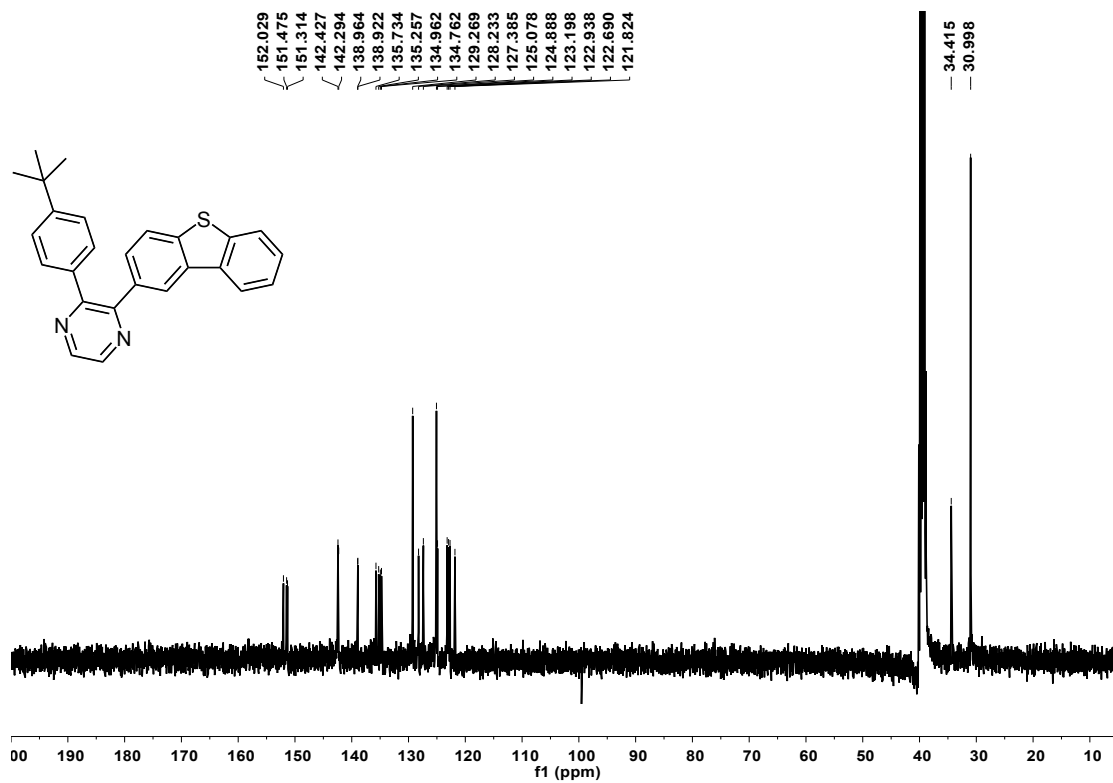

3wa

<sup>1</sup>H NMR

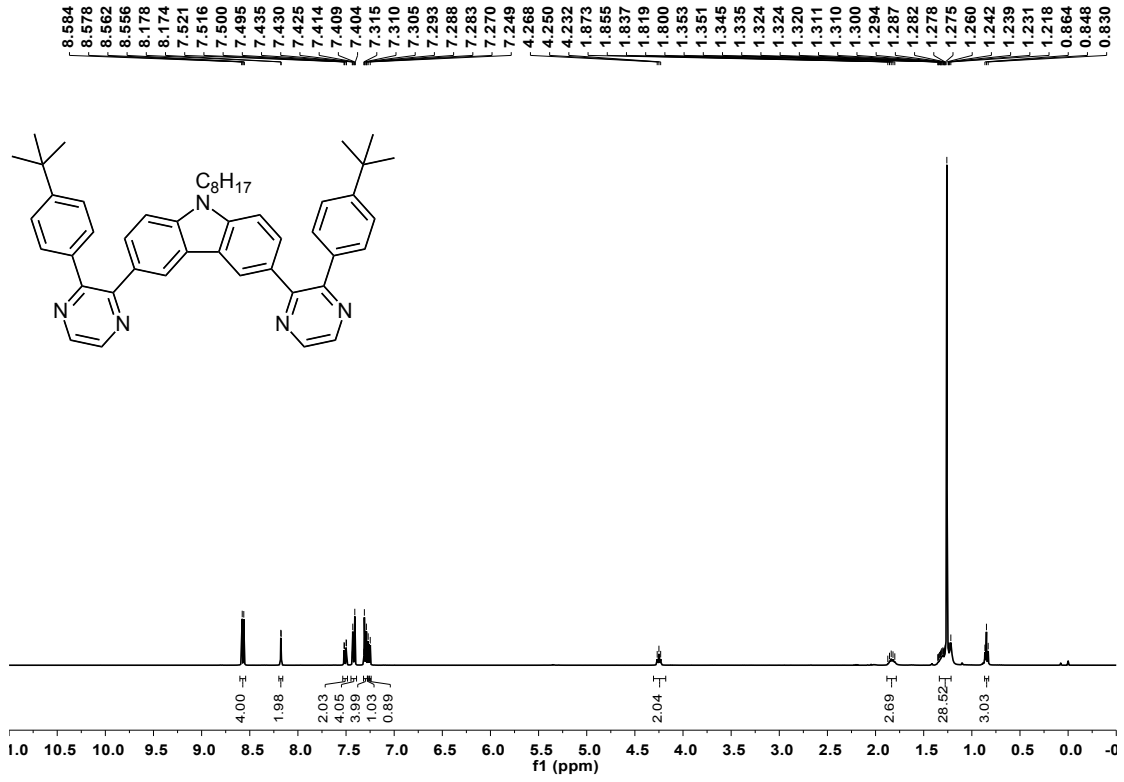

<sup>13</sup>C NMR

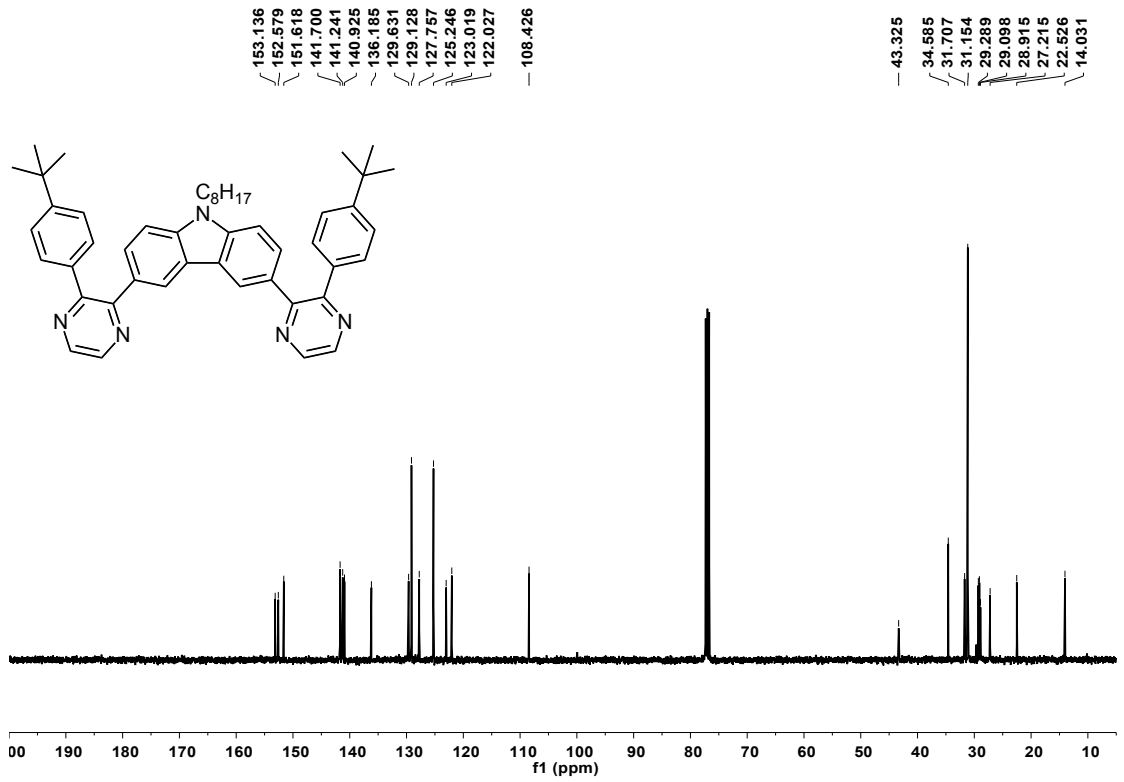

## References

- (1) Viswanadham, K. K. D. R.; Prathap Reddy, M.; Sathyanarayana, P.; Ravi, O.; Kant, R.; Bathula, S. R., *Chem. Commun.* **2014**, *50*, 13517-13520.
- (2) Ouyang, J.-S.; Li, Y.-F.; Huang, F.-D.; Lu, D.-D.; Liu, F.-S., *ChemCatChem.* **2018**, *10*, 371-375.
- (3) Wu, K.; Huang, Z.; Qi, X.; Li, Y.; Zhang, G.; Liu, C.; Yi, H.; Meng, L.; Bunel, E. E.; Miller, J. T.; Pao, C.-W.; Lee, J.-F.; Lan, Y.; Lei, A., *Sci. Adv.* **2015**, *1*, e1500656.
- (4) Huang, T.-Q.; Qu, W.-Y.; Ding, J.-C.; Liu, M.-C.; Wu, H.-Y.; Chen, J.-X., *J. Heterocyclic Chem.* **2013**, *50*, 293-297.
- (5) Huang, W.-X.; Liu, L.-J.; Wu, B.; Feng, G.-S.; Wang, B.; Zhou, Y.-G., *Org. Lett.* **2016**, *18*, 3082-3085.
- (6) Leclerc, J. P.; Fagnou, K., *Angew. Chem. Int. Ed.* **2006**, *118*, 7945-7950.
- (7) Watanabe, T.; Hayashi, K.; Sakurada, J.; Ohki, M.; Takamatsu, N.; Hirohata, H.; Takeuchi, K.; Yuasa, K.; Ohta, A., *Heterocycles*, **1989**, *29*, 123-131.
